# Supplementary material for: TP63-Mediated Enhancer Reprogramming Drives the Squamous Subtype of Pancreatic Ductal Adenocarcinoma
Source: PubMed Central journal article supplement — Cell Rep. Author manuscript; Available in PMC 2018 Dec 17. (PMC6296757; doi:10.1016/j.celrep.2018.10.051), 2018-11-13
Supplement: NIHMS1514164-supplement-9.pdf [file NIHMS1514164-supplement-9.pdf]

## TP63-Mediated Enhancer Reprogramming Drives the Squamous Subtype of Pancreatic Ductal Adenocarcinoma

### Graphical Abstract

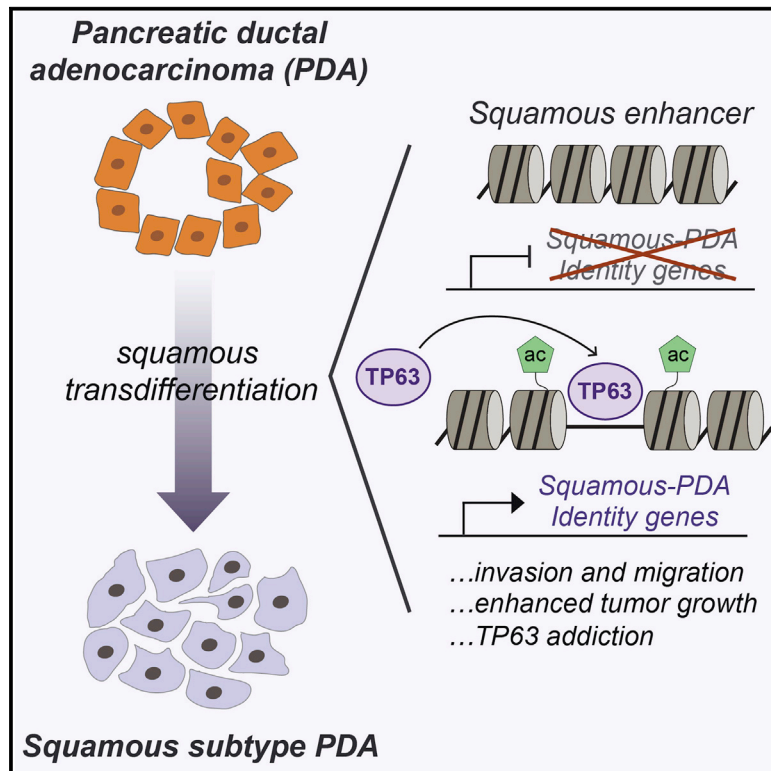

### Authors

Tim D.D. Somerville, Yali Xu, Koji Miyabayashi, ..., Joseph P. Milazzo, David A. Tuveson, Christopher R. Vakoc

### Correspondence

vakoc@cshl.edu

### In Brief

Somerville et al. report that the transcription factor TP63 is a master regulator of squamous-subtype pancreatic cancer as it reprograms the enhancer landscape to drive squamous transdifferentiation, promoting invasion, migration, *in vivo* tumor growth, and poor prognosis.

### Highlights

- TP63 reprograms enhancers to drive squamous transdifferentiation in PDA
- TP63 expression promotes migration, invasion, and *in vivo* tumor growth
- Sustained TP63 expression is essential for the growth of squamous PDA cells
- TP63 regulates an oncogenic network that operates in the squamous subtype of PDA

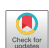

# TP63-Mediated Enhancer Reprogramming Drives the Squamous Subtype of Pancreatic Ductal Adenocarcinoma

Tim D.D. Somerville,<sup>1</sup> Yali Xu,<sup>1</sup> Koji Miyabayashi,<sup>1,2</sup> Hervé Tiriac,<sup>1,2</sup> Cristian R. Cleary,<sup>1,3</sup> Diogo Maia-Silva,<sup>1,4</sup> Joseph P. Milazzo,<sup>1</sup> David A. Tuveson,<sup>1,2</sup> and Christopher R. Vakoc<sup>1,5,\*</sup>

<sup>1</sup>Cold Spring Harbor Laboratory, Cold Spring Harbor, NY 11724, USA

<sup>2</sup>Lustgarten Foundation Pancreatic Cancer Research Laboratory, Cold Spring Harbor, NY 11724, USA

<sup>3</sup>Graduate Program in Genetics, Stony Brook University, Stony Brook, NY 11794, USA

<sup>4</sup>Watson School of Biological Sciences, Cold Spring Harbor Laboratory, Cold Spring Harbor, NY 11724, USA

<sup>5</sup>Lead Contact

\*Correspondence: [vakoc@cshl.edu](mailto:vakoc@cshl.edu)

<https://doi.org/10.1016/j.celrep.2018.10.051>

## SUMMARY

The aberrant expression of squamous lineage markers in pancreatic ductal adenocarcinoma (PDA) has been correlated with poor clinical outcomes. However, the functional role of this putative transdifferentiation event in PDA pathogenesis remains unclear. Here, we show that expression of the transcription factor TP63 ( $\Delta Np63$ ) is sufficient to install and sustain the enhancer landscape and transcriptional signature of the squamous lineage in human PDA cells. We also demonstrate that TP63-driven enhancer reprogramming promotes aggressive tumor phenotypes, including enhanced cell motility and invasion, and an accelerated growth of primary PDA tumors and metastases *in vivo*. This process ultimately leads to a powerful addiction of squamous PDA cells to continuous TP63 expression. Our study demonstrates the functional significance of squamous transdifferentiation in PDA and reveals TP63-based reprogramming as an experimental tool for investigating mechanisms and vulnerabilities linked to this aberrant cell fate transition.

## INTRODUCTION

Pancreatic ductal adenocarcinoma (PDA) is an aggressive malignancy that typically presents at an advanced stage and is refractory to most available treatments, with a median 5-year survival rate of <8% (Siegel et al., 2018). This malignancy is typically initiated by an activating mutation in *KRAS* in a ductal or an acinar cell of the pancreas, which collaborates with the loss of tumor suppressor genes to drive PDA progression (Aguirre et al., 2003; Hingorani et al., 2003, 2005). Despite our deep understanding of the genetic drivers and the molecular pathogenesis of PDA, pathway-specific targeted therapies have yet to be implemented in the management of disease. Among the numerous challenges in advancing targeted therapies in PDA

is the profound heterogeneity of tumor cell phenotypes within the current histology-based definition of this disease, which limits our ability to predict responses to targeted agents.

Dynamic transitions in cell fate are one important source of inter- and intra-tumoral heterogeneity in PDA. For example, experiments in mouse models have shown that PDA can originate in a pancreatic acinar cell, which transdifferentiates into a ductal cell following the introduction of mutant *Kras* (Ferreira et al., 2017; Guerra et al., 2007). In later stages of disease progression, it is known that PDA can transiently lose the expression of epithelial cell markers and gain mesenchymal features, in association with metastatic spread (Genovese et al., 2017; Krebs et al., 2017; McDonald et al., 2017; Rhim et al., 2012). Moreover, a subset of PDA tumors exhibit epigenetic silencing of endodermal cell fate determinants, including hepatocyte nuclear factor 1 homeobox A (HNF1A), HNF1B, HNF4A, and Kruppel-like factor 5 (KLF5), in association with a stable epithelial-to-mesenchymal fate transition (David et al., 2016; Diaferia et al., 2016). We have recently shown that mouse and human PDA tumors can upregulate the pioneer factor Forkhead box A1 (FOXA1), which leads to the activation of an embryonic foregut endoderm enhancer landscape to endow tumor cells with metastatic potential (Roe et al., 2017). Collectively, these studies highlight aberrant cell fate transitions as a hallmark property of PDA, which can be understood mechanistically by epigenomic mapping of the global enhancer configuration.

It has long been recognized that a subset of PDA tumors acquire features of the squamous epithelial lineage (Morohoshi et al., 1983), although the clinical relevance of this aberrant cell fate transition is not well understood. Squamous epithelial cells are a specialized cell type found in the epidermis, oropharynx, and other anatomical locations, but this cell type does not exist in the normal pancreas (Basturk et al., 2005). Nonetheless, histological analyses have revealed that a subset of human PDAs possess an adenosquamous cell morphology, which is invariably associated with the expression of TP63, a master regulator of the normal squamous lineage (Mills et al., 1999; Soares and Zhou, 2018). Recent transcriptome profiling of human tumor specimens revealed that squamous lineage markers are expressed in as much as 25% of PDA tumors, which includes the

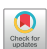

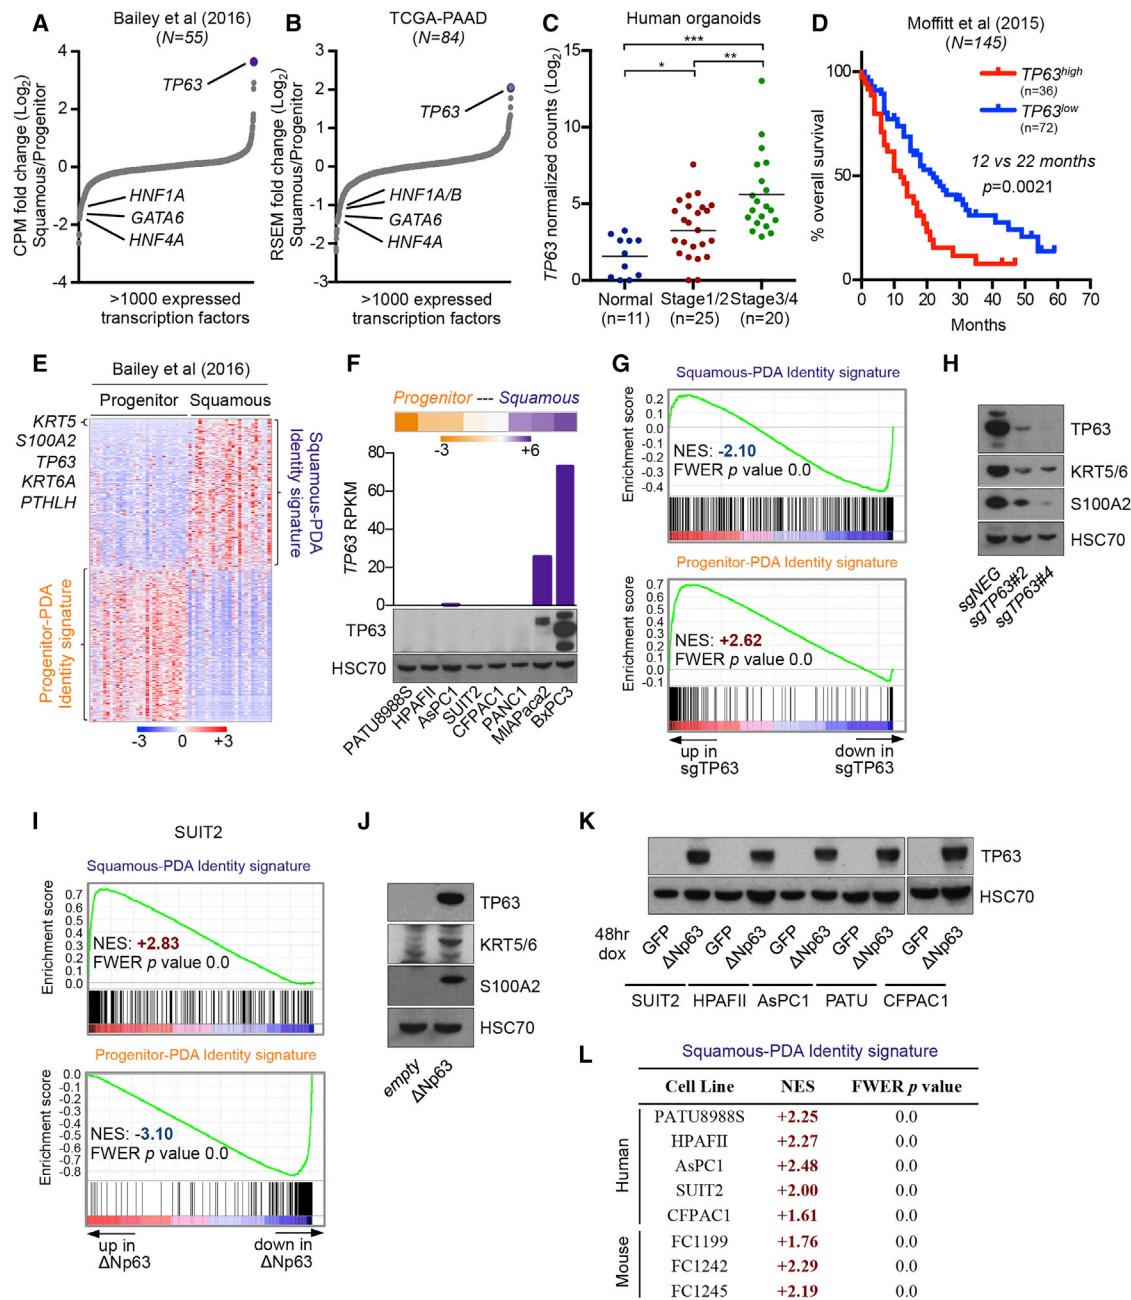

**Figure 1. ΔNp63 Is Necessary and Sufficient to Drive Progenitor-to-Squamous Transcriptional Reprogramming in Human PDA Cells**

(A and B) Transcription factor expression in squamous and progenitor subtypes of PDA. Scatterplots show expressed transcription factors ranked by their mean log<sub>2</sub> fold change in squamous versus progenitor patient samples from (A) Bailey et al. (2016) and (B) The Cancer Genome Atlas Research Network (2017).

(C) TP63 expression in human organoids derived from normal pancreatic tissue or PDA tumor samples at the indicated disease stage. Data are from the study by Tiriác et al. (2018). \*p < 0.05, \*\*p < 0.01, \*\*\*p < 0.001 by unpaired Student's t test. See also Table S1.

(D) Survival curve of patients from the indicated study stratified according to high or low TP63 expression and for which survival data were available (Moffitt et al., 2015). Samples were designated as TP63<sup>high</sup> or TP63<sup>low</sup> based on Z score expression values >0.35 or <0, respectively. p value was calculated using the log rank (Mantel-Cox) test.

(E) Squamous-PDA and progenitor-PDA identity signatures defined from patient samples. The top 500 protein coding genes in squamous (n = 25) or progenitor (n = 30) patient samples from the study by Bailey et al. (2016) were used to define the respective signatures. Heatmap shows expression levels of signature genes. Scale bar indicates the standardized expression value. See also Table S2.

(F) TP63 expression in human PDA cell lines. Heatmap (top) shows RNA-seq analysis of human PDA cell lines ranked according to fold change in the median expression level of genes corresponding to the squamous-PDA versus progenitor-PDA identity signatures; scale bar indicates log<sub>2</sub> fold change. Bar chart (middle) and western blot analysis (bottom) show TP63 expression in the indicated human PDA cell lines.

(legend continued on next page)

adenosquamous tumors as well as specimens that lack clear evidence of this cell morphology (Bailey et al., 2016). These squamous-like PDAs are associated with an inferior prognosis when compared to tumors lacking this transcriptional signature. While the origin of a squamous identity in this disease is poorly understood, it has been recognized that squamous-like PDAs are enriched for loss-of-function mutations in the tumor-suppressor genes *TP53*, *KDM6A*, *KMT2C*, and *KMT2D* (Andricovich et al., 2018; Bailey et al., 2016).

A recent study used genetically engineered mice to show that inactivation of the histone demethylase gene *Kdm6a*, in conjunction with a *Kras*<sup>G12D</sup> mutation, led to the emergence of aggressive PDAs that express squamous lineage markers (Andricovich et al., 2018). In addition, it was shown that *Kdm6a* loss led to the aberrant activation of enhancers at the *Trp63* (the mouse ortholog of *TP63*), *Runx3*, and *Myc* loci. While this important study validates *Kdm6a* as a genetic driver of PDA progression and establishes a model system for interrogating this disease subtype, it did not address whether squamous transdifferentiation was a cause or a consequence of the aggressive tumor phenotype. This is particularly relevant because *KDM6A* is a general chromatin regulator, which may perform tumor-suppressor functions irrespective of cell lineage (Ezponda et al., 2017).

In this study, we show that the  $\Delta N$  isoform of the transcription factor TP63 ( $\Delta Np63$ ) is a master regulator that specifies squamous cell identity in PDA through dynamic regulation of the enhancer landscape. Based on this observation, we use  $\Delta Np63$  to introduce squamous lineage characteristics into otherwise isogenic PDA cell lines, which we use to interrogate the functional consequences of this cell fate transition *in vitro* and *in vivo*. These experiments implicate  $\Delta Np63$ -driven enhancer reprogramming as a mechanism that promotes PDA progression by endowing tumors with enhanced growth and invasive potential. In addition, we identify a network of oncogenic target genes sustained by  $\Delta Np63$  that operate in the squamous subtype of PDA. In addition to validating the functional significance of squamous transdifferentiation in PDA, our study suggests that targeting the  $\Delta Np63$  transcriptional network may have therapeutic potential in this aggressive disease subtype.

## RESULTS

### TP63 Is Expressed in a Subset of Pancreatic Tumors that Display a Squamous-like Transcriptional Signature and Inferior Overall Survival

Prior studies have noted the expression of squamous lineage markers in a poor-prognosis subtype of PDA (Bailey et al., 2016). To investigate the functional importance of this cell fate

transition, we first sought to identify the master regulator transcription factor (TF), whose presence is sufficient to confer squamous cell identity in PDA. To this end, we evaluated existing transcriptome analyses of PDA tumors in search of TFs that are selectively expressed in the squamous-like subtype of this disease (Bailey et al., 2016; The Cancer Genome Atlas Research Network, 2017). Among all of the TFs expressed in PDA, we recovered *TP63* expression as the most highly enriched in squamous-subtype tumors, which is in accordance with prior observations and the known role of this TF in normal and neoplastic squamous lineage contexts (Figures 1A, 1B, S1A, and S1B) (Andricovich et al., 2018; Bailey et al., 2016). In addition, we found that endodermal TFs *GATA6*, *HNF1A*, *HNF1B*, and *HNF4A* are often silenced in *TP63*-expressing tumors, which is consistent with the mutually exclusive classification of PDA into progenitor and squamous subtypes (Bailey et al., 2016). Notably, *TP63* is expressed at low levels in normal human and mouse pancreatic epithelial cells, but it is aberrantly upregulated in 15%–26% of primary human PDA tumors and metastatic lesions (Figures S1C–S1F) (Boj et al., 2015; GTEx Consortium, 2015). To further corroborate this finding, we turned to our recently established collection of 56 human organoid cultures derived from normal pancreatic tissue or PDA tumors (Tiriac et al., 2018). Using RNA sequencing (RNA-seq) analysis, we verified that ~20% of PDA organoids express *TP63*, which increases in a stage-dependent manner (Figure 1C; Table S1). Using RT-PCR analysis, we determined that the  $\Delta N$  isoform of *TP63* ( $\Delta Np63$ ) is specifically expressed in these samples, which is known to be the oncogenic form of this TF (Figure S1G) (Rocco et al., 2006). *TP63* expression in PDA tumors was associated with an inferior overall survival across each study analyzed (Figures 1D, S1H, and S1I). Considering the known link between  $\Delta Np63$  and squamous cell carcinoma (Keyes et al., 2011), we investigated whether manipulating this TF would allow us to understand the importance of squamous lineage characteristics in PDA.

### Ectopic Expression of $\Delta Np63$ Is Sufficient to Drive Squamous Transcriptional Reprogramming in PDA Cell Lines

To evaluate lineage reprogramming in PDA, we used transcriptome analysis of PDA tumors from Bailey et al. (2016) to define gene expression signatures that discriminate squamous from progenitor cell identity in this disease (Figure 1E; Tables S2 and S3). The squamous-PDA identity signature includes known markers of the squamous cell lineage, including *TP63*, *KRT5*, *KRT6A*, *S100A2*, and *PTHLH* (Kaufmann et al., 2001; Shrestha et al., 1998; Kitazawa et al., 1991). We interrogated these signatures in RNA-seq data obtained from eight human PDA cell lines,

(G and H) TP63 knock out in BxPC3 cells. (G) GSEA plots evaluating the squamous-PDA and progenitor-PDA identity signatures upon TP63 knockout. (H) Representative western blot analysis for the indicated proteins. RNA was extracted and whole-cell lysates were prepared for the respective analyses on day 5 post-infection with sgRNAs, 3 days post-selection with G418.

(I and J)  $\Delta Np63$  expression in SUIT2 cells. (I) GSEA plots evaluating the squamous-PDA and progenitor-PDA identity signatures upon  $\Delta Np63$  expression. (J) Representative western blot analysis in SUIT2 cells for the indicated proteins. RNA was extracted and whole-cell lysates were prepared for the respective analyses on day 7 post-infection, 5 days following G418 selection.

(K and L) Acute  $\Delta Np63$  expression in progenitor-like PDA cells. (K) Representative western blot analysis in the indicated cell lines for the indicated proteins. (L) Table summarizing RNA-seq data evaluating the squamous-PDA identity signature upon induction of  $\Delta Np63$  expression in the indicated cell lines. RNA was extracted and whole-cell lysates were prepared for the respective analyses 48 hr following dox administration.

See also Figure S1.

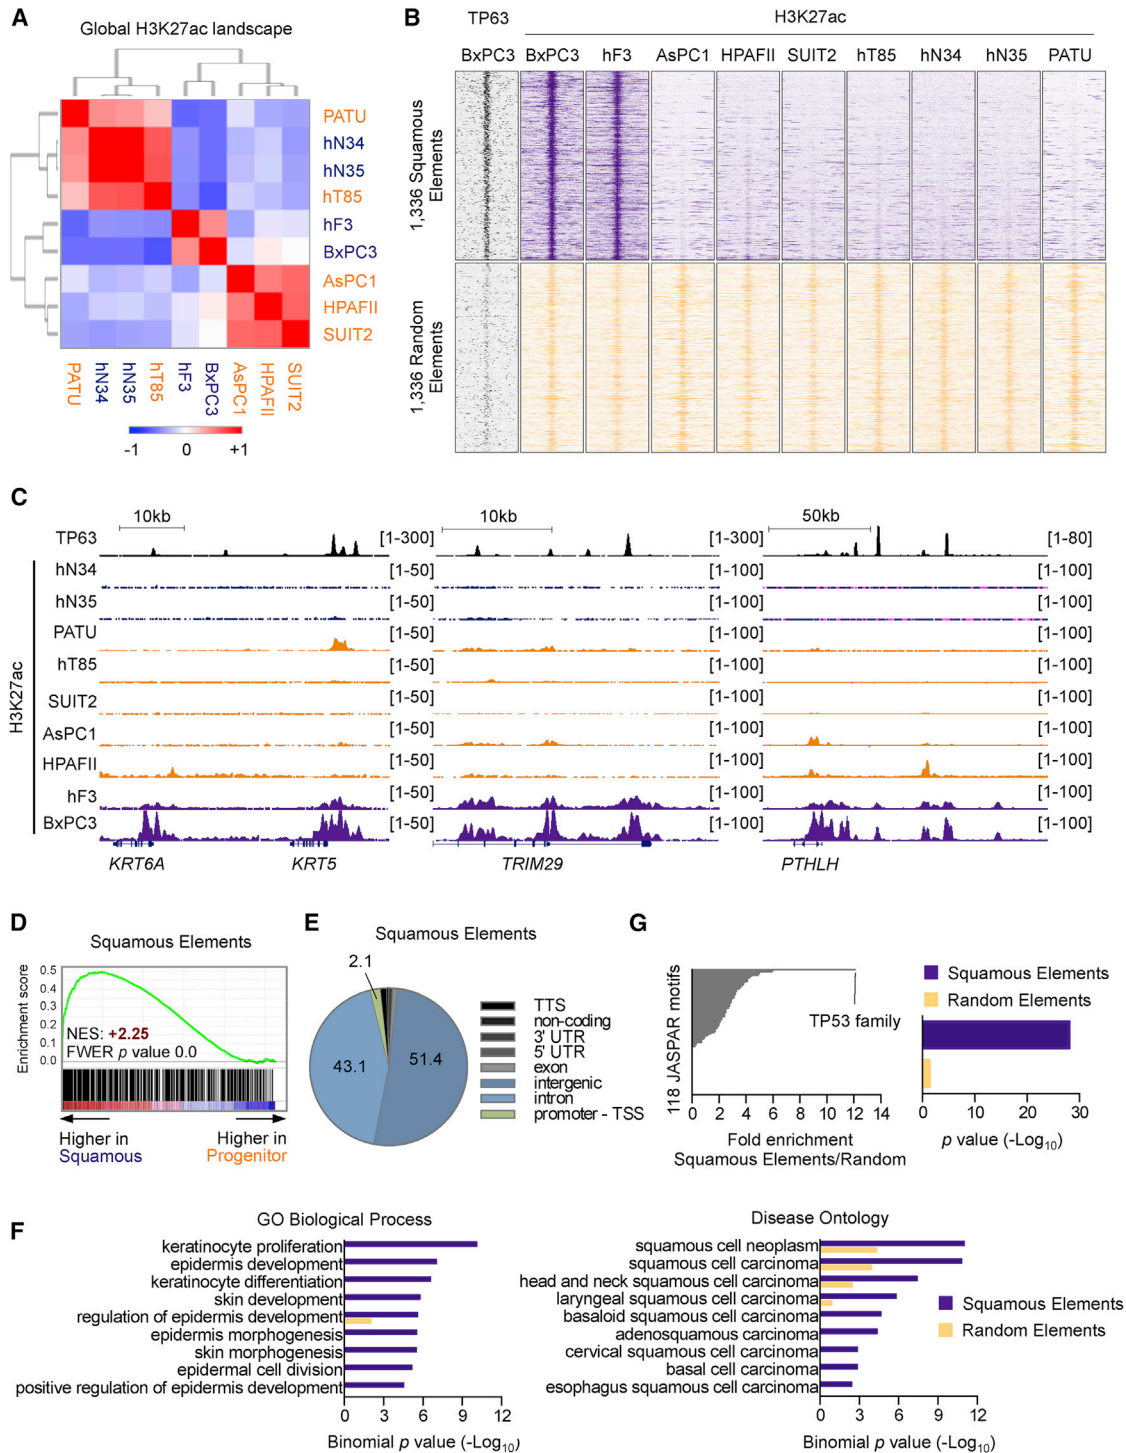

**Figure 2. A Unique Enhancer Landscape Linked to  $\Delta$ Np63 Occupancy in PDA**

(A) Heatmap representation of unsupervised hierarchical clustering of nine human cell lines or organoids representing PDA or normal pancreatic ducts based on H3K27ac occupancy at total H3K27ac ChIP-seq peaks. Scale bar indicates Pearson correlation coefficient. Normal organoids: hN34, hN35; PDA organoids: hF3, hT85; PATU: PATU8988S.

(B) ChIP-seq density plots of TP63 and H3K27ac enrichments at squamous elements (top) or a set of 1,336 control H3K27ac regions (bottom) in the indicated cell lines. Each row represents a 10-kb interval centered on the midpoint of each H3K27ac peak.

(C) ChIP-seq profiles of TP63 (top track) and H3K27ac at representative squamous elements close to *KRT5* and *KRT6A* (left), *TRIM29* (middle), and *PTHLH* (right).

(legend continued on next page)

which allowed us to rank each line based on its degree of resemblance to progenitor or squamous cell fates (Figure 1F). In accordance with the observations above in human tumors, TP63 mRNA and protein were only detected in the most squamous-like PDA cell lines MIAPaca2 and BxPC3 (Figure 1F). We focused our subsequent analysis of endogenous TP63 in BxPC3 cells as they express the relevant  $\Delta N$  isoforms, which is in contrast to MIAPaca2 cells, which instead express the tumor-suppressive transactivation domain (TA) isoform of TP63 (TAp63) (Figure S1J) (Yang et al., 1998). Using CRISPR-Cas9, we targeted TP63 in BxPC3 cells with two independent single guide RNAs (sgRNAs) and performed RNA-seq analysis. Gene set enrichment analysis (GSEA) (Subramanian et al., 2005) revealed that the loss of TP63 led to diminished expression of the squamous-PDA identity signature, which was further supported by an independent Gene Ontology analysis (Figures 1G and S1K). These gene expression changes were not limited to mRNA levels, as loss of KRT5/6 and S100A2 protein was also verified by western blotting (Figure 1H). In addition, inactivating TP63 also led to a paradoxical induction of the progenitor-PDA identity signature, suggesting an antagonistic relation between these two cell fates in PDA. These experiments suggest that the squamous transcriptional signature in PDA is enforced by the presence of TP63.

Having validated the causal relation between TP63 and the human PDA tumor-derived squamous transcriptional signature, we next evaluated whether ectopic expression of TP63 would be sufficient to endow PDA cell lines with the transcriptional profile of the squamous cell lineage. To this end, we initially lentivirally transduced the  $\Delta Np63$  cDNA into two progenitor-like PDA cell lines, SUIT2 and PATU8988S (Figure 1F; Table S4). RNA-seq analysis of these cells revealed that  $\Delta Np63$  enhanced the expression of squamous-PDA identity gene signatures in both settings (Figures 1I, S1L, and S1M), which we also verified by western blotting for squamous markers KRT5/6 and S100A2 (Figure 1J). Consistent with the findings above,  $\Delta Np63$  diminished the progenitor-PDA identity signature in both settings (Figures 1I and S1M). To investigate the sufficiency of  $\Delta Np63$  to install squamous transcriptional features across a broader panel of PDA cells in a more acute manner, we generated cell lines in which  $\Delta Np63$  expression was under the control of doxycycline (dox). The addition of dox led to robust activation of  $\Delta Np63$  expression (Figures 1K and S1N), and this was accompanied by potent activation of the squamous-PDA identity gene signature in all of the human cell lines tested, as well as PDA cells derived from KPC (*Kras*<sup>+/LSL-G12D</sup>; *Trp53*<sup>+/LSL-R172H</sup>; *Pdx1-Cre*) mice (Figure 1L). These results demonstrate the necessity and sufficiency of  $\Delta Np63$  to produce squamous-like features in PDA.

### A Unique Enhancer Configuration Linked to $\Delta Np63$ Genomic Occupancy in PDA

Prior work has shown that lineage transitions in PDA are mediated through alterations of the chromatin state and the associated landscape of active enhancer elements (Diaferia et al., 2016; McDonald et al., 2017; Roe et al., 2017). However, it has yet to be determined whether a distinct enhancer-chromatin configuration exists in squamous versus progenitor subtypes of PDA. To address this, we performed chromatin immunoprecipitation sequencing (ChIP-seq) analysis in 10 human cell lines or organoids representing PDA or normal pancreatic ducts to map the genome-wide pattern of histone H3 lysine 27 acetylation (H3K27ac), which is a covalent modification that demarcates active *cis*-regulatory elements (Rada-Iglesias et al., 2011). These cultures include PDAs that express TP63 and other squamous lineage markers, including the TAp63-expressing MIAPaca2 cells and two  $\Delta Np63$ -expressing PDAs (BxPC3 cells and the hF3 organoid), whereas the other cultures express the progenitor-PDA identity signature (Figures 1F and S2A). An unsupervised clustering analysis of the global pattern of H3K27ac enrichment across the 10 cultures revealed three major groups (Figures 2A and S2B). The most progenitor-like samples formed two distinct clusters: one containing PATU8988S, hT85, and the two normal ductal organoids, and the other containing AsPC1, HPAFII, and SUIT2 cells. We found that the two  $\Delta Np63$ -expressing squamous-like cultures (BxPC3 and hF3) formed a distinct cluster, suggesting a unique enhancer-chromatin configuration linked to this cell fate (Figure 2A). Of note, the TAp63-expressing MIAPaca2 cell line did not cluster together with the two  $\Delta Np63$ -expressing cultures, indicating that this cell line is epigenetically distinct (Figure S2B).

We next extracted the subset of H3K27ac-enriched regions that correlated with the BxPC3 and hF3 cell cluster, which identified 1,336 regions that we termed “squamous elements” (Figures 2B and 2C; Table S5). Squamous elements were almost entirely found at distal (non-promoter) sites and were located near genes that were preferentially expressed in the squamous subtype of PDA, suggesting that they represent enhancer elements (Figures 2D and 2E). In addition, an unbiased ontology analysis of genes located near these elements confirmed their association with the normal and neoplastic squamous lineage (e.g., epidermis development, squamous cell carcinoma) (Figure 2F). *KRT5/6*, *TRIM29*, and *PTHLH* are examples of squamous lineage genes located in proximity to squamous elements (Figure 2C). These data complement prior transcriptional observations (Bailey et al., 2016) by suggesting that a subset of PDA tumors display an enhancer landscape resembling the squamous cell lineage.

(D) GSEA plots evaluating the relative expression of genes proximal to squamous elements in squamous or progenitor patient samples from the study by Bailey et al. (2016). See also Table S5.

(E) Pie chart showing the genomic distribution of squamous elements according to annotation of H3K27ac peaks by HOMER. TTS, transcription termination site; TSS, transcription start site.

(F) Ontology analysis of genes located nearest to squamous elements versus control elements using GREAT. Gene Ontology (GO) terms related to biological process (left) and disease ontology (right) are shown.

(G) Representation of motifs enriched at squamous elements versus control elements using TRAP. Human promoters were used as the comparison library. Left: fold change in p value. The TP53 position weight matrix is represented as TP53 family motif. Right: enrichment of the TP53 motif at squamous elements and control elements as determined by p value.

See also Figure S2.

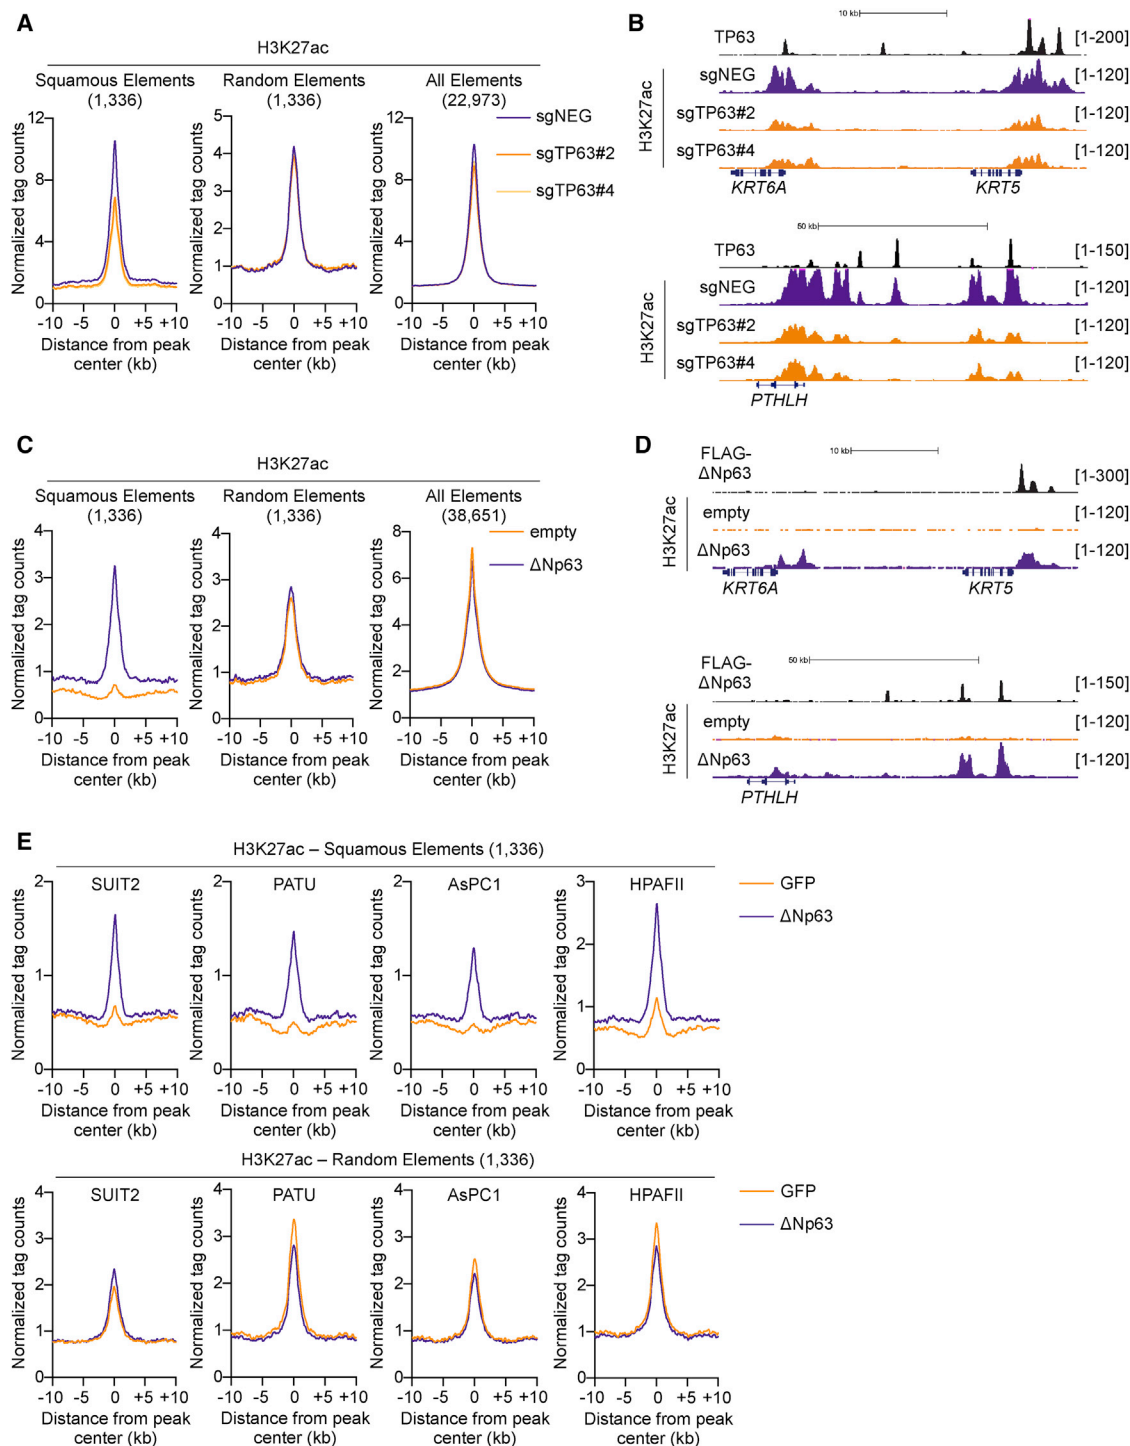

**Figure 3. ΔNp63 Expression Is Sufficient to Install and Maintain a Squamous Enhancer Landscape in PDA**

(A and B) TP63 knockout in BxPC3 cells and H3K27ac ChIP-seq analysis. (A) Metagenes representation of H3K27ac signal in squamous elements (left), random control elements (middle), and all of the H3K27ac elements (right) in TP63 knockout and control cells. (B) ChIP-seq profiles of TP63 (top track) and H3K27ac at representative squamous elements close to *KRT5* and *KRT6A* (top) and *PTHLH* (bottom). BxPC3-Cas9 cells were cross-linked and prepared for ChIP-seq analysis on day 5 post-infection, 3 days following G418 selection, with two independent TP63 or control sgRNAs (sgNEGs).

(C and D) ΔNp63 expression in SUIT2 cells and H3K27ac ChIP-seq analysis. (C) Metagenes representation of H3K27ac signal in squamous elements (left), random control elements (middle), and all of the H3K27ac elements (right) in SUIT2 cells expressing ΔNp63 or control cells. (D) ChIP-seq profiles of ectopically expressed

(legend continued on next page)

We next investigated the causal role of TP63 in activating squamous elements in the context of PDA. Using a TF affinity prediction (TRAP) motif enrichment analysis (Thomas-Chollier et al., 2011), we identified a motif recognized by TP63 as the most enriched sequence within the entire group of squamous elements (Figure 2G) (Yang et al., 1998). This finding led us to perform ChIP-seq analysis of endogenous TP63 in BxPC3 cells, which revealed pervasive TP63 occupancy at squamous elements. In contrast, we observed much lower levels of TP63 occupancy at a control set of H3K27ac-enriched locations (Figures 2B, 2C, S2C, and S2D). These findings indicate that squamous elements are linked to the occupancy of TP63 in the squamous-like subtype of PDA.

Having established a link between TP63 and squamous elements in PDA, we next evaluated the functional requirement of TP63 to activate these *cis*-regulatory elements. We used ChIP-seq to profile H3K27ac in BxPC3-Cas9 cells following acute transduction with TP63 sgRNAs (Figure S3A). This analysis revealed a selective reduction in H3K27ac at squamous elements, whereas the levels of this histone mark were unchanged at control locations (Figures 3A and 3B). To complement this loss-of-function experiment, we next evaluated whether expression of TP63 would be sufficient to activate squamous elements. To this end, we performed ChIP-seq analysis in control or  $\Delta$ Np63-expressing SUIT2 cells to profile the impact on the enhancer landscape. While parental SUIT2 cells possess background levels of H3K27ac enrichment at squamous elements, introducing  $\Delta$ Np63 led to a selective induction of H3K27ac at these locations, which now resembled the enhancer configuration observed in hF3 and BxPC-3 cells that possess endogenous  $\Delta$ Np63 expression (Figures 3C, 3D, and S3B). To further investigate the sufficiency of  $\Delta$ Np63 to install squamous enhancers across a broader panel of PDA cells, we performed ChIP-seq analysis of H3K27ac enrichment following dox-inducible expression of  $\Delta$ Np63 in the four most progenitor-like human PDA cell lines. In each cell line tested, acute induction of  $\Delta$ Np63 produced potent and selective acetylation of squamous elements (Figures 3E and S3C). Together with the transcriptional profiling results above, these findings indicate that toggling the function of  $\Delta$ Np63 allows for the experimental manipulation of the enhancer landscape that underlies the squamous subtype of PDA.

### Phenotypic Consequences of $\Delta$ Np63-Mediated Enhancer Reprogramming

We reasoned that the phenotypic characterization of SUIT2 cell lines transduced with  $\Delta$ Np63 provided an ideal system for probing the functional significance of this enhancer reprogramming event in this disease. Under tissue culture monolayer conditions, we found that expression of  $\Delta$ Np63 led to a reduced rate of SUIT2 cell proliferation, but enhanced cell motility in a scratch-wound assay (Figures 4A and 4B). In three-dimensional growth assay conditions in media supplemented with Matrigel (Corning

Life Sciences),  $\Delta$ Np63-expressing SUIT2 cells formed fewer colonies than control cells; however, the colonies that formed were significantly larger and possessed more invasive projections (Figures 4C and S4A). These findings suggested that  $\Delta$ Np63 expression alters the growth and invasive characteristics of PDA cells *in vitro*.

To extend these findings into the more relevant *in vivo* environment, we transplanted the  $\Delta$ Np63-reprogrammed or control SUIT2 cells harboring a luciferase transgene into the pancreas of immunodeficient mice and monitored tumor progression using bioluminescent imaging. Following transplantation of equal numbers of cells, we found at initial time points that  $\Delta$ Np63-expressing SUIT2 cells displayed less efficient engraftment levels in comparison to their control counterparts, which is in accordance with experiments performed *in vitro* (Figures 4D and S4B). However, the  $\Delta$ Np63-expressing cells proceeded to expand more rapidly compared to controls and gave rise to significantly larger tumors at the endpoint of the experiment (Figures 4D and 4E). When injected into the tail vein of mice,  $\Delta$ Np63-expressing cells colonized the lung parenchyma with similar kinetics to control mice, but formed larger metastatic lesions at the terminal endpoint of the experiment (Figures 4F and S4C). Histological examination of the primary tumors revealed that  $\Delta$ Np63 expression gave rise to poorly differentiated tumors, and immunohistochemical staining confirmed the upregulation of squamous lineage markers (Figure 4G). These data suggest that enhancer reprogramming imposed by  $\Delta$ Np63 confers enhanced growth characteristics to PDA cells *in vivo* in both primary and metastatic tissue contexts.

### Squamous PDA Cells Become Addicted to $\Delta$ Np63

The findings above led us to investigate whether squamous PDA cells become addicted to  $\Delta$ Np63 to sustain their growth potential. Using CRISPR-Cas9 competition-based proliferation assays evaluating the effects of individual sgRNAs, we validated that TP63 is essential for the growth of BxPC3 cells, but dispensable in other PDA contexts (Figures 5A, S5A, and S5B). To rule out any CRISPR-induced artifacts, we also targeted TP63 in BxPC3 cells using small hairpin RNAs (shRNAs) and observed a similar loss of proliferative potential and highly concordant gene expression changes to those seen following TP63 inactivation with sgRNAs (Figures S5C–S5F). Moreover, knock down of TP63 in the hF3 PDA organoid sample also resulted in a growth arrest and suppression of the squamous-PDA identity signature (Figures 5B, 5C, and S5G). The growth arrest phenotype in BxPC3 cells could be rescued by expressing a CRISPR-resistant cDNA encoding  $\Delta$ Np63, with the degree of rescue correlating with the levels of reconstituted  $\Delta$ Np63 protein (Figures 5D, 5E, and S5H). We next evaluated the impact of  $\Delta$ Np63 inactivation on PDA growth *in vivo* by transducing BxPC3-Cas9-luciferase cells with TP63 sgRNAs before transplantation into the pancreas or the tail vein of immunodeficient mice. By monitoring tumor progression

FLAG-tagged TP63 (top track) and H3K27ac at representative squamous elements close to *KRT5* and *KRT6A* (top) and *PTHLH* (bottom). SUIT2 cells were cross-linked and prepared for ChIP-seq analysis on day 7 post-infection, 5 days post-G418 selection.

(E) Metagene representation of H3K27ac signal in squamous elements (top) and random control elements (bottom) in the indicated progenitor-like PDA cells following dox-inducible expression of  $\Delta$ Np63 or GFP as a control. Cells were cross-linked and prepared for ChIP-seq analysis 48 hr following dox administration. See also Figure S3.



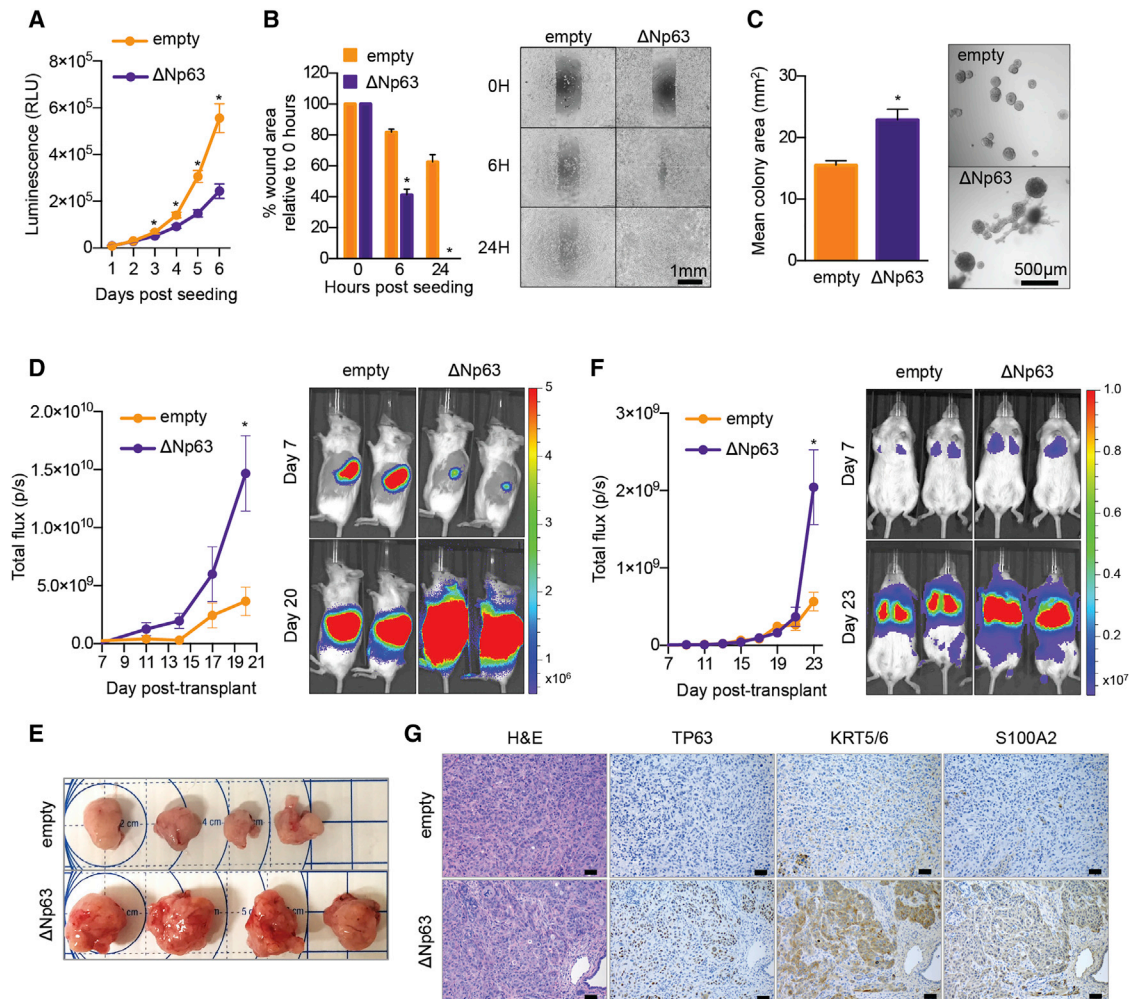

**Figure 4. Phenotypic Consequences of  $\Delta$ Np63-mediated Enhancer Reprogramming**

(A–C) *In vitro* consequences of  $\Delta$ Np63-mediated squamous lineage reprogramming. SUIT2 cells were infected with  $\Delta$ Np63 cDNA or an empty vector and assayed on day 7 post-transduction, day 5 post-G418 selection. (A) Line graph showing *in vitro* cell growth as determined by CellTiter-Glo (Promega) assay. Means  $\pm$  SEMs are shown.  $n = 3$ . (B) Bar chart (left) showing quantification of scratch assays at the indicated time points post-seeding, and representative images are shown (right). Means  $\pm$  SEMs are shown.  $n = 3$ . (C) Bar chart (left) showing quantification of colony size in three-dimensional (3D) Matrigel colony formation assays on day 7 post-plating, day 14 post-viral transduction. Colony size was measured using ImageJ software (NIH). Means  $\pm$  SEMs are shown.  $n = 3$ . Representative images at day 7 are shown (right).

(D–G) *In vivo* consequences of  $\Delta$ Np63-mediated squamous lineage reprogramming. SUIT2 cells harboring a luciferase transgene were infected with  $\Delta$ Np63 cDNA or an empty vector and transplanted on day 5 post-viral transduction, day 3 post-G418 selection. (D) Line graph (left) shows quantification of the bioluminescence signal following orthotopic injection of 50,000 cells to the pancreas of NSG mice. Means  $\pm$  SEMs are shown. Mice were imaged on days 7, 11, 14, 17, and 20 post-transplantation, and representative images are shown (right).  $n = 4$  mice per group. (E) Bright-field images of tumors removed from mice shown in (D) on day 21 post-transplantation. (F) Line graph (left) shows quantification of bioluminescence signal following injection of 100,000 cells via the tail vein of NSG mice. Means  $\pm$  SEMs are shown. Mice were imaged every 2 days from days 7 to 23 post-transplantation, and representative images are shown (right panel).  $n = 5$  mice per group. Scale bar indicates luminescence signal. (G) Representative H&E (left) or immunohistochemical staining for the indicated proteins of tumor samples from (E). Scale bar indicates 50  $\mu$ m. \* $p < 0.001$  by two-way ANOVA with Sidak's test for multiple comparisons.

See also Figure S4.

using bioluminescent imaging, we found that TP63 inactivation resulted in complete arrest of tumor growth when compared to control cells, both at the primary site and in the lung parenchyma (Figures 5F–5I and S5). These results are complementary to our experiments in reprogrammed SUIT2 cells and suggest that squamous-like PDA tumors become addicted to  $\Delta$ Np63 to sustain tumor growth *in vivo*.

We next investigated which target genes within the  $\Delta$ Np63-reprogrammed enhancer landscape may be relevant to the progression of PDA. For this purpose, we analyzed our collective RNA-seq and ChIP-seq datasets in search of high-confidence  $\Delta$ Np63 target genes. By intersecting the genes downregulated following TP63 ablation in BxPC3 cells with the genes upregulated following  $\Delta$ Np63 expression in SUIT2 cells, we

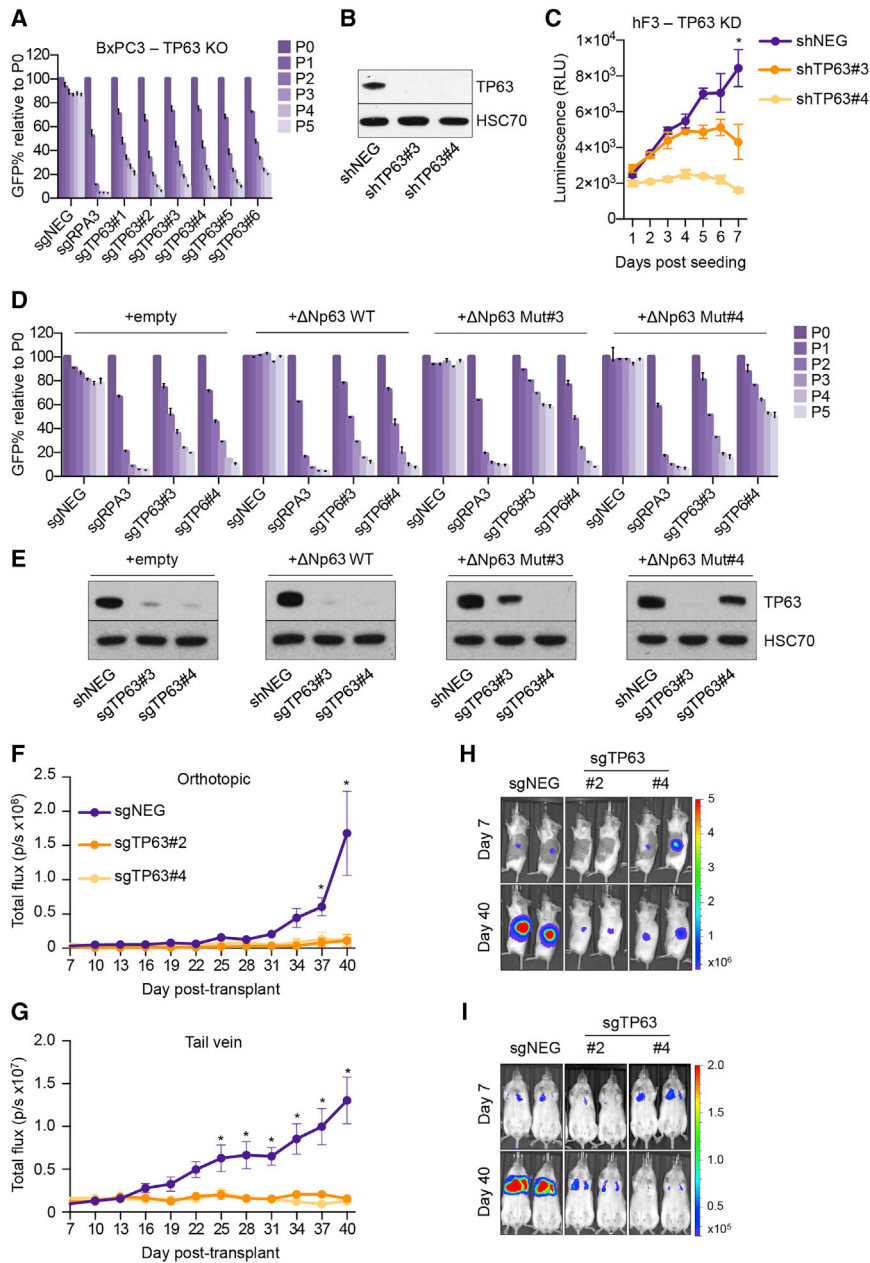

**Figure 5.  $\Delta$ Np63 Is a Dependency in Squamous PDA Cells**

(A) Competition-based proliferation assay in BxPC3 cells following infection with the indicated sgRNAs linked to GFP. Means + SEMs are shown.  $n = 3$ .

(B and C) TP63 knockdown in hF3 organoids. (B) Representative western blot analysis for the indicated proteins in the indicated conditions. Whole-cell lysates were prepared on day 8 post-infection with shRNAs, 5 days post-selection with puromycin. (C) Line graph showing *in vitro* cell growth as determined by CellTiter-Glo assay following infection with the indicated shRNAs. Means  $\pm$  SEMs are shown.  $n = 3$ . \* $p < 0.01$  by two-way ANOVA with Sidak's test for multiple comparisons.

(D and E) TP63 sgRNA/cDNA rescue assay in BxPC3 cells. (D) Competition-based proliferation assay in BxPC3 cells stably expressing the indicated cDNA following infection with the indicated sgRNAs linked to GFP. Means + SEMs are shown.  $n = 3$ . (E) Representative western blot analysis for the indicated proteins in the indicated conditions. Whole-cell lysates were prepared on day 5 post-infection with sgRNAs; the GFP percentage was >95% in each condition for western blot analysis.  $\Delta$ Np63 WT, wild-type  $\Delta$ Np63;  $\Delta$ Np63 Mut#3,  $\Delta$ Np63 cDNA resistant to sgTP63#3;  $\Delta$ Np63 Mut#4,  $\Delta$ Np63 cDNA resistant to sgTP63#4.

(F and G) *In vivo* consequences of TP63 knockout. BxPC3-Cas9 cells expressing a luciferase transgene were infected with two independent TP63 or control (sgNEG) sgRNAs before transplantation on day 5 post-infection, 3 days post-G418 selection. Line graphs show quantification of bioluminescence signal following injection of 100,000 cells to the pancreas (F) or 250,000 cells via the tail vein (G) of NSG mice. Means  $\pm$  SEMs are shown.

(H and I) Representative bioluminescence images at the indicated days post-transplant following injection of cells to the pancreas (H) or via the tail vein (I) of NSG mice. Scale bar indicates bioluminescence signal.  $n = 4$ –5 mice per group. \* $p < 0.01$  by two-way ANOVA with Sidak's test for multiple comparisons.

See also [Figure S5](#).

recovered 63 candidate  $\Delta$ Np63 targets. We reduced this list to 58 genes by requiring that a target gene be located near a peak of TP63 occupancy detected by ChIP-seq (Figure 6A; Table S6). As expected, these 58 genes were preferentially expressed in the squamous subtype of PDA and included the previously described squamous lineage genes *KRT5*, *PTHLH*, and *S100A2* (Figure S6A). From a literature search, we note that many of the  $\Delta$ Np63 target genes encode proteins that have been causally implicated in promoting tumor cell growth and cancer progression in prior studies, such as *HRAS* and *CXCL8* (Grabocka et al., 2014; Young et al., 2013) (Figures 6B–6D; Table 1). Consistent with these observations, these

genes are concordantly downregulated following TP63 knockdown in the hF3 PDA organoid (Figures S6B and S6C). We additionally found that *MYC* mRNA and protein were significantly downregulated following TP63 inactivation, which is in accord with the elevated level of the *MYC* transcriptional network in squamous-subtype PDA tumors (Bailey et al., 2016) (Figures S5E, S6D, and S6E). Our ChIP-seq analysis identified several TP63-occupied squamous elements at the *MYC* locus, which may account for TP63-mediated *MYC* regulation (Figure S6F). This analysis reveals a network of cancer-promoting  $\Delta$ Np63 targets that are activated during enhancer reprogramming in squamous-subtype PDA.

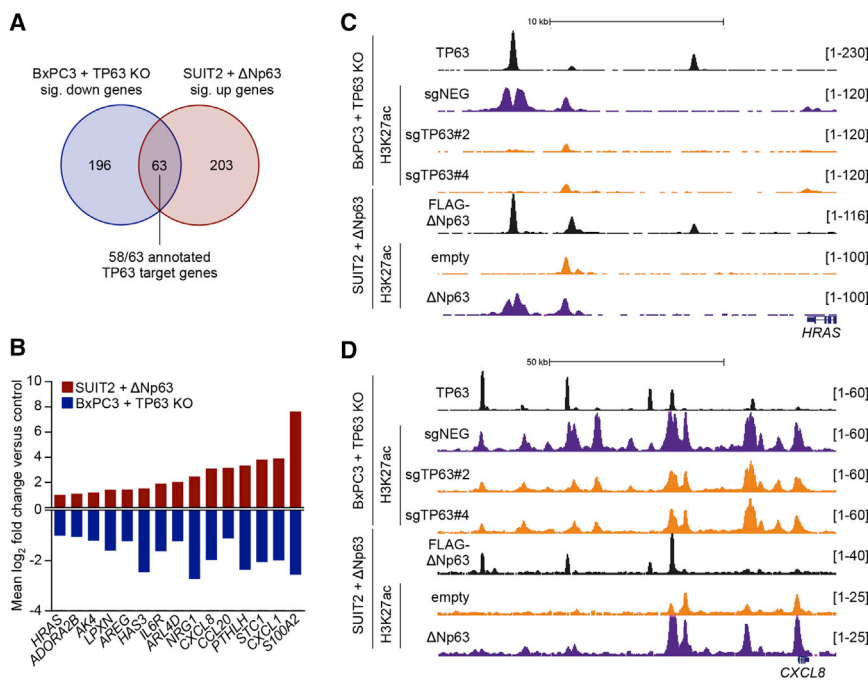

**Figure 6. The Core Circuitry of ΔNp63-Mediated Enhancer Reprogramming in Squamous PDA Cells**

(A) Venn diagram showing the overlap of significantly downregulated genes in BxPC3-Cas9 cells and upregulated genes in SUIT2 cells following infection with sgRNAs targeting TP63 or expression of ΔNp63 cDNA, respectively (fold change >2,  $p < 0.01$ ). See also Table S6.

(B) Bar graph showing the mean log<sub>2</sub> fold change of example genes from (A). See also Table 1.

(C and D) ChIP-seq profiles of TP63, FLAG-tagged ΔNp63, and H3K27ac at the ΔNp63 target genes *HRAS* (C) and *CXCL8* (D) following TP63 knockout in BxPC3-Cas9 cells or expression of ΔNp63 in SUIT2 cells.

See also Figure S6.

## DISCUSSION

Prior studies have shown that squamous lineage markers become aberrantly expressed in a subset of aggressive PDAs (Andricovich et al., 2018; Bailey et al., 2016; Morohoshi et al., 1983). Here, we have pursued the causal role of squamous transdifferentiation in PDA progression using an experimental approach that exploits the master regulator concept, which is classically defined by the ability of certain TFs to drive cell fate transitions by functioning at the apex of a gene regulatory network (Davis et al., 1987). The gain- and loss-of-function epigenomic analysis presented in this study validates ΔNp63 as a master regulator of the squamous identity in PDA, which is consistent with the known role of this TF in normal squamous epithelial tissues and in squamous cell carcinomas (Soares and Zhou, 2018). We have used the master regulator property of ΔNp63 to endow PDA cells with the enhancer landscape and transcriptional signature associated with squamous identity without the confounding effect of altering the tumor genotype. This approach leverages recent transcriptome analyses of human PDA to validate that ΔNp63-mediated reprogramming produced in cell lines faithfully recapitulates the transcriptional profile seen in human tumors (Bailey et al., 2016; The Cancer Genome Atlas Research Network, 2017). This approach allowed us to demonstrate that a ΔNp63-driven enhancer landscape promotes PDA progression *in vivo*.

Our study highlights the utility of enhancer profiling as a strategy for mapping cell fate transitions in cancer and for the validation of lineage reprogramming by master regulators in an experimental setting. In specific cancers, enhancer profiling has revealed novel tumor subtypes that reflect an alternative cell of origin (Lin et al., 2016). In pancreatic cancer, enhancer profiling has been used to provide insight into transdifferentiation

mechanisms of cellular lineage. For example, prior work in cancer cell lines revealed an enhancer configuration established by endodermal lineage TFs (e.g., KLF5), which becomes extinguished in cell lines with mesenchymal features (Diaferia et al., 2016). We previously used a mouse organoid progression model of PDA to reveal the activation of an embryonic foregut enhancer landscape by FOXA1, which promotes disease progression and metastatic spread (Roe et al., 2017). However, neither of these prior studies focused on the squamous subtype of PDA, which has only recently been recognized as a common form of PDA with an exceptionally poor prognosis (Bailey et al., 2016). A major finding in our study is that massive alterations of the enhancer landscape occur upon acquiring a squamous identity, which strongly suggests that the previously described squamous transcriptional signature in PDA reflects a bona fide cell fate transition in this disease.

Our prior studies highlighted the role of TFs in driving the reorganization of enhancers and promoting disease progression and metastatic spread in PDA, identifying FOXA1 as a driver of this process (Roe et al., 2017). However, in contrast to FOXA1, which requires cooperating TFs to achieve effective enhancer activation in PDA, here, we demonstrate that ΔNp63 expression alone is sufficient to install squamous enhancer elements and promote aggressive disease characteristics in this disease. The powerful effects of ΔNp63 on the enhancer landscape of PDA cells are also reflected in their ensuing addiction to the continued expression of this TF, as well as an exceptionally poor prognosis in this group of PDA patients, which we did not observe to be the case for FOXA1 (Roe et al., 2017). Thus, although these studies highlight a common theme of enhancer reprogramming in driving disease progression in PDA, they also highlight that the functional and clinical outputs of this reprogramming event can be distinct and are determined by the master regulator TFs deregulated in this disease.

One unexpected result in our study is that ΔNp63 expression augments PDA tumor cell growth under *in vivo* conditions and in three-dimensional cultures, but not in two-dimensional

**Table 1.  $\Delta$ Np63 Target Genes with Oncogenic Potential**

| Putative $\Delta$ Np63 Target Gene | Oncogenic Phenotype                                                            | Reference                                  |
|------------------------------------|--------------------------------------------------------------------------------|--------------------------------------------|
| <i>S100A2</i>                      | migration and metastasis                                                       | Bulk et al., 2009                          |
| <i>CXCL1</i>                       | tumor growth, tumor cell survival, angiogenesis, myeloid cell recruitment      | Acharyya et al., 2012                      |
| <i>STC1</i>                        | tumor growth, tumor cell survival, metastasis                                  | Peña et al., 2013                          |
| <i>PTH1H</i>                       | metastasis, tumor growth, tumor cell survival                                  | Iguchi et al., 1996; Urosevic et al., 2014 |
| <i>CCL20</i>                       | metastasis, myeloid cell recruitment, EMT                                      | Ye et al., 2016                            |
| <i>CXCL8</i>                       | angiogenesis, tumor growth and migration, metastasis, myeloid cell recruitment | Waugh and Wilson, 2008                     |
| <i>NRG1</i>                        | tumor growth                                                                   | Sheng et al., 2010                         |
| <i>ARL4D</i>                       | tumor cell migration                                                           | Li et al., 2007                            |
| <i>IL6R</i>                        | tumor progression and inflammation                                             | Hodge et al., 2005                         |
| <i>HAS3</i>                        | tumor growth, angiogenesis, ECM deposition, migration                          | Itano et al., 2002; Liu et al., 2001       |
| <i>AREG</i>                        | tumor growth, cell migration, chemoresistance                                  | Peterson et al., 2015; Zhang et al., 2009  |
| <i>LPXN</i>                        | tumor progression                                                              | Kaulfuß et al., 2009                       |
| <i>AK4</i>                         | tumor invasion and metastasis                                                  | Jan et al., 2012                           |
| <i>ADORA2B</i>                     | invasion, migration and metastasis                                             | Desmet et al., 2013                        |
| <i>HRAS</i>                        | tumor cell growth, survival, and maintenance                                   | Grabocka et al., 2014; Young et al., 2013  |

ECM, extracellular matrix; EMT, epithelial-to-mesenchymal transition.

See also Figure 6.

monolayer conditions. This finding can be explained, as many of the  $\Delta$ Np63 target genes identified in this study have been previously shown to drive migratory and invasive properties of tumor cells, such as *HAS3* and *S100A2* (Bulk et al., 2009; Itano et al., 2002). Moreover, a number of  $\Delta$ Np63 target genes encode proteins that can modulate the tumor microenvironment. This includes the genes *CXCL1*, *CXCL8*, and *CCL20*, which encode pro-inflammatory cytokines that can drive tumor progression through non-cell-autonomous mechanisms, such as promoting angiogenesis and the recruitment of tumor-propagating myeloid cells (Acharyya et al., 2012; Waugh and Wilson, 2008; Ye et al., 2016). It is also noteworthy that some  $\Delta$ Np63 target genes may have effects that reach beyond the local microenvironment. For example, the gene *PTH1H* encodes a secreted hormone that is implicated in hypercalcemia of malignancy and cachexia (Burtis et al., 1987; Iguchi et al., 1996; Kir et al., 2014; Urosevic et al., 2014). We hypothesize that  $\Delta$ Np63-driven enhancer reprogramming and hijacking of the squamous lineage program provide an efficient means for PDA cells to acquire capabilities for sustained invasive growth into the tissue parenchyma of the pancreas and at distal sites. It may also play a systemic role during the course of disease progression.

Prior studies have implicated a role for  $\Delta$ Np63 as an oncogene, such as in squamous cell carcinoma (Rocco et al., 2006). Diverse mechanisms have been proposed to explain the tumor-promoting function of  $\Delta$ Np63, which include antagonism of p53, modulation of microRNAs, bypass of senescence, and enhanced cancer stem cell activity (Keyes et al., 2011; Memmi et al., 2015; Su et al., 2010; Yang et al., 1998). To our knowledge, our study is the first to demonstrate that  $\Delta$ Np63 is sufficient to reprogram the enhancer landscape of PDA cells and confer properties of the squamous cell lineage, thus implicating squamous transdifferentiation in tumor progression. Of note, *in vitro* experiments performed using

our dox-regulated system in SUIT2 cells, whereby  $\Delta$ Np63 was transiently introduced and subsequently removed, suggest that the addiction to  $\Delta$ Np63 does not occur immediately following its expression, but instead requires a longer period of transdifferentiation before the addiction ensues (data not shown). It is important to consider that the aberrant acquisition of a squamous identity in PDA occurs in the context of a highly mutated cancer genome, which includes oncogenic KRAS and inactivation of several tumor-suppressor genes, as well as within the complexity of the tumor microenvironment. Thus, it is likely that the genes activated through the mechanism of TP63-mediated enhancer reprogramming collaborate with the milieu of established genetic mutations within the context of a PDA cell to promote this disease.

The observation that squamous-like PDAs are enriched for mutations in specific tumor suppressors suggests that certain genotypes may be more permissive for the acquisition of a squamous-like identity in PDA (Andricovich et al., 2018; Bailey et al., 2016). A recent study described a *Kras*<sup>G12D</sup>/*Kdm6a*<sup>-/-</sup> mouse model of PDA that forms tumors that express TP63 (Andricovich et al., 2018). Because *KDM6A* mutations are enriched in squamous-like human PDAs, the Andricovich et al. (2018) study establishes how specific genotypes can predispose tumor cells to acquire squamous attributes. However, mutations in *KDM6A* (and other related chromatin regulators) only account for less than half of the squamous PDA tumors (Bailey et al., 2016). This suggests the existence of additional mechanisms that activate TP63 expression in PDA. Prior work has implicated genotoxic stress, hypoxia, Notch ligands, and Hedgehog signals as regulating TP63 expression, suggesting a possibility that non-genetic mechanisms in the pancreas microenvironment may also contribute to the squamous lineage transition in PDA (Li et al., 2008; Petitjean et al., 2008; Tadeu and Horsley, 2013; Xi et al., 2017). Moreover, it also possible that other TFs participate in the acquisition of

squamous cell characteristics in PDA. For example, SOX2 can function as a lineage oncogene in squamous cell carcinomas (Bass et al., 2009), and MYC amplifications have been correlated with adenosquamous variants of pancreatic cancer (Witkiewicz et al., 2015). While our findings suggest a functional link between MYC and  $\Delta$ Np63, we did not find evidence for a role for SOX2 in squamous transdifferentiation in PDA (data not shown). Nevertheless, our findings and the work of Andricovich et al. (2018) provide complementary evidence in human and murine systems, respectively, to implicate the acquisition of a squamous-like identity as a contributor to PDA progression.

A major challenge in implementing cancer therapy is in identifying tumor biomarkers that predict exceptional responses. In this study, we have shown that introducing  $\Delta$ Np63 into a PDA cell line is sufficient to reprogram the epigenome and cell identity to one that resembles human squamous-like PDA tumors. This approach provides a powerful isogenic cell system for investigating unique vulnerabilities linked with the squamous subtype of PDA. For example, domain-focused CRISPR screening could be applied to control and  $\Delta$ Np63-expressing SUIT2 cells to discover actionable targets that are linked with this cell fate transition (Shi et al., 2015). More broadly, our study calls attention to the use of master regulator TFs as predictive biomarkers for targeted therapies, thus implicating isogenic-reprogrammed cell lines as a powerful tool for revealing dependencies linked with specific cellular states.

## STAR★METHODS

Detailed methods are provided in the online version of this paper and include the following:

- KEY RESOURCES TABLE
- CONTACT FOR REAGENT AND RESOURCE SHARING
- EXPERIMENTAL MODEL AND SUBJECT DETAILS
  - Mice
  - Cell Lines
- METHOD DETAILS
  - Plasmid Construction
  - Lentiviral Production and Infection
  - *In Vitro* Phenotypic Assays
  - CRISPR-Based Targeting
  - shRNA targeting in BxPC3 cells and hF3 organoids
  - *In Vivo* Transplantation Experiments
  - Histology and Immunohistochemistry
  - Cell Lysate Preparation for Western Blot Analysis
  - RNA Extraction and RT-PCR
  - RNA-seq Library Construction
  - ChIP and ChIP-Seq Library Construction
  - RNA-Seq Data Analysis
  - ChIP-Seq Analysis
- QUANTIFICATION AND STATISTICAL ANALYSIS
- DATA AND SOFTWARE AVAILABILITY

## SUPPLEMENTAL INFORMATION

Supplemental Information six figures and seven tables and can be found with this article online at <https://doi.org/10.1016/j.celrep.2018.10.051>.

## ACKNOWLEDGMENTS

We would like to thank Rachel Rubino and Jill Habel from Cold Spring Harbor Laboratory (CSHL) Animal Resources for technical assistance with the mouse transplantation assays and John E. Wilkinson from the University of Michigan School of Medicine for the analysis of mouse histopathology. In addition, we thank the following CSHL shared resource core facilities: Animal and Animal Imaging, Bioinformatics, and DNA Sequencing and Histology. T.D.D.S. was supported by a grant from the State of New York, contract no. C150158. C.R.V. was supported by Pershing Square Sohn Cancer Research Alliance, Boehringer Ingelheim, the Cold Spring Harbor Laboratory and Northwell Health Affiliation, the National Cancer Institute (NCI) 5P01CA013106-Project 4, and a Career Development Award from the Pancreatic Cancer Action Network-American Association for Cancer Research (AACR) 16-20-25-VAKO. D.A.T. is supported by the Lustgarten Foundation of Pancreatic Cancer Research and the NIH (NIH 5P30CA45508-29, 5P50CA101955-07, P20CA192996-03, 1U10CA180944-04, 1R01CA188134-01, and 1R01CA190092-04).

## AUTHOR CONTRIBUTIONS

T.D.D.S. and C.R.V. designed experiments, analyzed the data, and wrote the manuscript. T.D.D.S. performed the majority of the experiments. Y.X., K.M., H.T., C.R.C., D.M.-S., and J.P.M. assisted with the experiments. C.R.V. and D.A.T. supervised the research.

## DECLARATION OF INTERESTS

C.R.V. is an advisor to KSQ Therapeutics and receives research funding from Boehringer Ingelheim. D.A.T. is a member of the scientific advisory boards of Surface Oncology, Leap Therapeutics, MabImmune, VividBiosciences, and Bethyl Antibodies. D.A.T. has stock ownership in Surface Oncology and Leap Therapeutics. D.A.T. receives research support from ONO and Fibrogen.

Received: June 27, 2018

Revised: September 6, 2018

Accepted: October 12, 2018

Published: November 13, 2018

## REFERENCES

- Acharyya, S., Oskarsson, T., Vanharanta, S., Malladi, S., Kim, J., Morris, P.G., Manova-Todorova, K., Leversha, M., Hogg, N., Seshan, V.E., et al. (2012). A CXCL1 paracrine network links cancer chemoresistance and metastasis. *Cell* 150, 165–178.
- Aguirre, A.J., Bardeesy, N., Sinha, M., Lopez, L., Tuveson, D.A., Horner, J., Redston, M.S., and DePinho, R.A. (2003). Activated Kras and Ink4a/Arf deficiency cooperate to produce metastatic pancreatic ductal adenocarcinoma. *Genes Dev.* 17, 3112–3126.
- Aiello, N.M., Rhim, A.D., and Stanger, B.Z. (2016). Orthotopic injection of pancreatic cancer cells. *Cold Spring Harb. Protoc.* 2016, pdb.prot078360.
- Andricovich, J., Perkail, S., Kai, Y., Casasanta, N., Peng, W., and Tzatsos, A. (2018). Loss of KDM6A Activates Super-Enhancers to Induce Gender-Specific Squamous-like Pancreatic Cancer and Confers Sensitivity to BET Inhibitors. *Cancer Cell* 33, 512–526.e8.
- Bailey, T.L., Boden, M., Buske, F.A., Frith, M., Grant, C.E., Clementi, L., Ren, J., Li, W.W., and Noble, W.S. (2009). MEME SUITE: tools for motif discovery and searching. *Nucleic Acids Res.* 37, W202–W208.
- Bailey, P., Chang, D.K., Nones, K., Johns, A.L., Patch, A.M., Gingras, M.C., Miller, D.K., Christ, A.N., Bruxner, T.J.C., Quinn, M.C., et al.; Australian Pancreatic Cancer Genome Initiative (2016). Genomic analyses identify molecular subtypes of pancreatic cancer. *Nature* 531, 47–52.
- Bass, A.J., Watanabe, H., Mermel, C.H., Yu, S., Perner, S., Verhaak, R.G., Kim, S.Y., Wardwell, L., Tamayo, P., Gat-Viks, I., et al. (2009). SOX2 is an amplified lineage-survival oncogene in lung and esophageal squamous cell carcinomas. *Nature Genetics* 41, 1238.

- Basturk, O., Khanani, F., Sarkar, F., Levi, E., Cheng, J.D., and Adsay, N.V. (2005). DeltaNp63 expression in pancreas and pancreatic neoplasia. *Mod. Pathol.* **18**, 1193–1198.
- Boj, S.F., Hwang, C.-I., Baker, L.A., Chio, I.I.C., Engle, D.D., Corbo, V., Jager, M., Ponz-Sarvisé, M., Tiriac, H., Spector, M.S., et al. (2015). Organoid models of human and mouse ductal pancreatic cancer. *Cell* **160**, 324–338.
- Bulk, E., Sargin, B., Krug, U., Hascher, A., Jun, Y., Knop, M., Kerkhoff, C., Gerke, V., Liersch, R., Mesters, R.M., et al. (2009). S100A2 induces metastasis in non-small cell lung cancer. *Clin. Cancer Res.* **15**, 22–29.
- Burtis, W.J., Wu, T., Bunch, C., Wysolmerski, J.J., Insogna, K.L., Weir, E.C., Broadus, A.E., and Stewart, A.F. (1987). Identification of a novel 17,000-dalton parathyroid hormone-like adenylate cyclase-stimulating protein from a tumor associated with humoral hypercalcemia of malignancy. *J. Biol. Chem.* **262**, 7151–7156.
- Cerami, E., Gao, J., Dogrusoz, U., Gross, B.E., Sumer, S.O., Aksoy, B.A., Jacobsen, A., Byrne, C.J., Heuer, M.L., Larsson, E., et al. (2012). The cBio cancer genomics portal: an open platform for exploring multidimensional cancer genomics data. *Cancer Discov.* **2**, 401–404.
- Chatterjee, A., Upadhyay, S., Chang, X., Nagpal, J.K., Trink, B., and Sidransky, D. (2008). U-box-type ubiquitin E4 ligase, UFD2a attenuates cisplatin mediated degradation of DeltaNp63alpha. *Cell Cycle* **7**, 1231–1237.
- David, C.J., Huang, Y.H., Chen, M., Su, J., Zou, Y., Bardeesy, N., Iacobuzio-Donahue, C.A., and Massagué, J. (2016). TGF- $\beta$  tumor suppressor through a lethal EMT. *Cell* **164**, 1015–1030.
- Davis, R.L., Weintraub, H., and Lassar, A.B. (1987). Expression of a single transfected cDNA converts fibroblasts to myoblasts. *Cell* **51**, 987–1000.
- Desmet, C.J., Gallenne, T., Prieur, A., Rey, F., Visser, N.L., Wittner, B.S., Smit, M.A., Geiger, T.R., Laoukili, J., Iskit, S., et al. (2013). Identification of a pharmacologically tractable Fra-1/ADORA2B axis promoting breast cancer metastasis. *Proc. Natl. Acad. Sci. USA* **110**, 5139–5144.
- Diaferia, G.R., Balestrieri, C., Prosperini, E., Nicoli, P., Spaggiari, P., Zerbi, A., and Natoli, G. (2016). Dissection of transcriptional and cis-regulatory control of differentiation in human pancreatic cancer. *EMBO J.* **35**, 595–617.
- Ezponda, T., Dupéré-Richer, D., Will, C.M., Small, E.C., Varghese, N., Patel, T., Nabet, B., Popovic, R., Oyer, J., Bulic, M., et al. (2017). UTX/KDM6A Loss Enhances the Malignant Phenotype of Multiple Myeloma and Sensitizes Cells to EZH2 inhibition. *Cell Rep.* **21**, 628–640.
- Fellmann, C., Hoffmann, T., Sridhar, V., Hopfgartner, B., Muhar, M., Roth, M., Lai, D.Y., Barbosa, I.A., Kwon, J.S., Guan, Y., et al. (2013). An optimized micro-RNA backbone for effective single-copy RNAi. *Cell Rep.* **5**, 1704–1713.
- Feng, J., Liu, T., Qin, B., Zhang, Y., and Liu, X.S. (2012). Identifying ChIP-seq enrichment using MACS. *Nat. Protoc.* **7**, 1728–1740.
- Ferreira, R.M.M., Sancho, R., Messal, H.A., Nye, E., Spencer-Dene, B., Stone, R.K., Stamp, G., Rosewell, I., Quaglia, A., and Behrens, A. (2017). Duct- and Acinar-Derived Pancreatic Ductal Adenocarcinomas Show Distinct Tumor Progression and Marker Expression. *Cell Rep.* **21**, 966–978.
- Genovese, G., Carugo, A., Tepper, J., Robinson, F.S., Li, L., Svelto, M., Nezi, L., Corti, D., Minelli, R., Pettazoni, P., et al. (2017). Synthetic vulnerabilities of mesenchymal subpopulations in pancreatic cancer. *Nature* **542**, 362–366.
- Grabocka, E., Pylayeva-Gupta, Y., Jones, M.J., Lubkov, V., Yemanaberhan, E., Taylor, L., Jeng, H.H., and Bar-Sagi, D. (2014). Wild-type H- and N-Ras promote mutant K-Ras-driven tumorigenesis by modulating the DNA damage response. *Cancer Cell* **25**, 243–256.
- GTEx Consortium (2015). Human genomics. The Genotype-Tissue Expression (GTEx) pilot analysis: multitissue gene regulation in humans. *Science* **348**, 648–660.
- Guerra, C., Schuhmacher, A.J., Cañamero, M., Grippo, P.J., Verdager, L., Pérez-Gallego, L., Dubus, P., Sandgren, E.P., and Barbacid, M. (2007). Chronic pancreatitis is essential for induction of pancreatic ductal adenocarcinoma by K-Ras oncogenes in adult mice. *Cancer Cell* **11**, 291–302.
- Heinz, S., Benner, C., Spann, N., Bertolino, E., Lin, Y.C., Laslo, P., Cheng, J.X., Murre, C., Singh, H., and Glass, C.K. (2010). Simple combinations of lineage-determining transcription factors prime cis-regulatory elements required for macrophage and B cell identities. *Mol. Cell* **38**, 576–589.
- Hingorani, S.R., Petricoin, E.F., Maitra, A., Rajapakse, V., King, C., Jacobetz, M.A., Ross, S., Conrads, T.P., Veenstra, T.D., Hitt, B.A., et al. (2003). Preinvasive and invasive ductal pancreatic cancer and its early detection in the mouse. *Cancer Cell* **4**, 437–450.
- Hingorani, S.R., Wang, L., Multani, A.S., Combs, C., Deramaudt, T.B., Hruban, R.H., Rustgi, A.K., Chang, S., and Tuveson, D.A. (2005). Trp53R172H and KrasG12D cooperate to promote chromosomal instability and widely metastatic pancreatic ductal adenocarcinoma in mice. *Cancer Cell* **7**, 469–483.
- Hodge, D.R., Hurt, E.M., and Farrar, W.L. (2005). The role of IL-6 and STAT3 in inflammation and cancer. *Eur. J. Cancer* **41**, 2502–2512.
- Iguchi, H., Tanaka, S., Ozawa, Y., Kashiwakuma, T., Kimura, T., Hiraga, T., Ozawa, H., and Kono, A. (1996). An experimental model of bone metastasis by human lung cancer cells: the role of parathyroid hormone-related protein in bone metastasis. *Cancer Res.* **56**, 4040–4043.
- Itano, N., Atsumi, F., Sawai, T., Yamada, Y., Miyaishi, O., Senga, T., Hamaguchi, M., and Kimata, K. (2002). Abnormal accumulation of hyaluronan matrix diminishes contact inhibition of cell growth and promotes cell migration. *Proc. Natl. Acad. Sci. USA* **99**, 3609–3614.
- Jan, Y.H., Tsai, H.Y., Yang, C.J., Huang, M.S., Yang, Y.F., Lai, T.C., Lee, C.H., Jeng, Y.M., Huang, C.Y., Su, J.L., et al. (2012). Adenylate kinase-4 is a marker of poor clinical outcomes that promotes metastasis of lung cancer by down-regulating the transcription factor ATF3. *Cancer Res.* **72**, 5119–5129.
- Kaufmann, O., Fietze, E., Mengers, J., and Dietel, M. (2001). Value of p63 and cytokeratin 5/6 as immunohistochemical markers for the differential diagnosis of poorly differentiated and undifferentiated carcinomas. *Am. J. Clin. Pathol.* **116**, 823–830.
- Kaulfuß, S., von Hardenberg, S., Schweyer, S., Herr, A.M., Laccone, F., Wolf, S., and Burfeind, P. (2009). Leupaxin acts as a mediator in prostate carcinoma progression through deregulation of p120catenin expression. *Oncogene* **28**, 3971.
- Keyes, W.M., Pecoraro, M., Aranda, V., Vernersson-Lindahl, E., Li, W., Vogel, H., Guo, X., Garcia, E.L., Michurina, T.V., Enikolopov, G., et al. (2011).  $\Delta Np63\alpha$  is an oncogene that targets chromatin remodeler Lsh to drive skin stem cell proliferation and tumorigenesis. *Cell Stem Cell* **8**, 164–176.
- Kim, D., Langmead, B., and Salzberg, S.L. (2015). HISAT: a fast spliced aligner with low memory requirements. *Nat. Methods* **12**, 357–360.
- Kir, S., White, J.P., Kleiner, S., Kazak, L., Cohen, P., Baracos, V.E., and Spiegelman, B.M. (2014). Tumour-derived PTH-related protein triggers adipose tissue browning and cancer cachexia. *Nature* **513**, 100–104.
- Kitazawa, S., Fukase, M., Kitazawa, R., Takenaka, A., Gotoh, A., Fujita, T., and Maeda, S. (1991). Immunohistologic evaluation of parathyroid hormone-related protein in human lung cancer and normal tissue with newly developed monoclonal antibody. *Cancer* **67**, 984–989.
- Krebs, A.M., Mitschke, J., Laserra Losada, M., Schmalhofer, O., Boerries, M., Busch, H., Boettcher, M., Mougiakakos, D., Reichardt, W., Bronsert, P., et al. (2017). The EMT-activator Zeb1 is a key factor for cell plasticity and promotes metastasis in pancreatic cancer. *Nat. Cell Biol.* **19**, 518–529.
- Langmead, B., and Salzberg, S.L. (2012). Fast gapped-read alignment with Bowtie 2. *Nat. Methods* **9**, 357–359.
- Li, C.C., Chiang, T.C., Wu, T.S., Pacheco-Rodriguez, G., Moss, J., Lee, F.J.S., and Barr, F. (2007). ARL4D recruits cytohesin-2/ARNO to modulate actin remodeling. *Mol. Biol. Cell* **18**, 4420–4437.
- Li, N., Singh, S., Cherukuri, P., Li, H., Yuan, Z., Ellisen, L.W., Wang, B., Robbins, D., and DiRenzo, J. (2008). Reciprocal intraepithelial interactions between TP63 and hedgehog signaling regulate quiescence and activation of progenitor elaboration by mammary stem cells. *Stem Cells* **26**, 1253–1264.
- Li, H., Handsaker, B., Wysoker, A., Fennell, T., Ruan, J., Homer, N., Marth, G., Abecasis, G., and Durbin, R.; 1000 Genome Project Data Processing Subgroup (2009). The Sequence Alignment/Map format and SAMtools. *Bioinformatics* **25**, 2078–2079.

- Lin, C.Y., Erkek, S., Tong, Y., Yin, L., Federation, A.J., Zapatka, M., Hal-  
dipur, P., Kawauchi, D., Risch, T., Warnatz, H.-J., et al. (2016). Active  
medulloblastoma enhancers reveal subgroup-specific cellular origins.  
*Nature* 530, 57–62.
- Liu, N., Gao, F., Han, Z., Xu, X., Underhill, C.B., and Zhang, L. (2001). Hyal-  
uronan synthase 3 overexpression promotes the growth of TSU prostate cancer  
cells. *Cancer Res.* 61, 5207–5214.
- McDonald, O.G., Li, X., Saunders, T., Tryggvadottir, R., Mentch, S.J.,  
Warmoos, M.O., Word, A.E., Carrer, A., Salz, T.H., Natsume, S., et al.  
(2017). Epigenomic reprogramming during pancreatic cancer progression  
links anabolic glucose metabolism to distant metastasis. *Nat. Genet.* 49,  
367–376.
- McLean, C.Y., Bristor, D., Hiller, M., Clarke, S.L., Schaar, B.T., Lowe, C.B.,  
Wenger, A.M., and Bejerano, G. (2010). GREAT improves functional interpre-  
tation of cis-regulatory regions. *Nat. Biotechnol.* 28, 495–501.
- Memmi, E.M., Sanarico, A.G., Giacobbe, A., Peschiaroli, A., Frezza, V.,  
Cicalese, A., Pisati, F., Tosoni, D., Zhou, H., Tonon, G., et al. (2015).  
p63 Sustains self-renewal of mammary cancer stem cells through regu-  
lation of Sonic Hedgehog signaling. *Proc. Natl. Acad. Sci. USA* 112,  
3499–3504.
- Mills, A.A., Zheng, B., Wang, X.-J., Vogel, H., Roop, D.R., and Bradley, A.  
(1999). p63 is a p53 homologue required for limb and epidermal morphogen-  
esis. *Nature* 398, 708–713.
- Moffitt, R.A., Marayati, R., Flate, E.L., Volmar, K.E., Loeza, S.G.H., Hoadley,  
K.A., Rashid, N.U., Williams, L.A., Eaton, S.C., Chung, A.H., et al. (2015). Virtual  
microdissection identifies distinct tumor- and stroma-specific subtypes of  
pancreatic ductal adenocarcinoma. *Nat. Genet.* 47, 1168–1178.
- Morohoshi, T., Held, G., and Klöppel, G. (1983). Exocrine pancreatic tumours  
and their histological classification. A study based on 167 autopsy and 97 sur-  
gical cases. *Histopathology* 7, 645–661.
- Peña, C., Céspedes, M.V., Lindh, M.B., Kiflemariam, S., Mezheyeuski, A.,  
Edqvist, P.H., Hägglöf, C., Birgisson, H., Bojmar, L., Jirstrom, K., et al.  
(2013). STC1 expression by cancer-associated fibroblasts drives metastasis  
of colorectal cancer. *Cancer Res* 73, 1287–1297.
- Peterson, E.A., Jenkins, E.C., Lofgren, K.A., Chandiramani, N., Liu, H., Aranda,  
E., Barnett, M., and Kenny, P.A. (2015). Amphiregulin is a critical downstream  
effector of estrogen signaling in ER $\alpha$ -positive breast cancer. *Cancer Res.* 75,  
4830–4838.
- Petitjean, A., Ruptier, C., Tribollet, V., Hautefeuille, A., Chardon, F., Cavard, C.,  
Puisieux, A., Hainaut, P., and Caron de Fromentel, C. (2008). Properties of the  
six isoforms of p63: p53-like regulation in response to genotoxic stress and  
cross talk with DeltaNp73. *Carcinogenesis* 29, 273–281.
- Quinlan, A.R., and Hall, I.M. (2010). BEDTools: a flexible suite of utilities for  
comparing genomic features. *Bioinformatics* 26, 841–842.
- Rada-Iglesias, A., Bajpai, R., Swigut, T., Bruggmann, S.A., Flynn, R.A., and  
Wysocka, J. (2011). A unique chromatin signature uncovers early develop-  
mental enhancers in humans. *Nature* 470, 279–283.
- Rhim, A.D., Mirek, E.T., Aiello, N.M., Maitra, A., Bailey, J.M., McAllister, F.,  
Reichert, M., Beatty, G.L., Rustgi, A.K., Vonderheide, R.H., et al. (2012).  
EMT and dissemination precede pancreatic tumor formation. *Cell* 148,  
349–361.
- Rocco, J.W., Leong, C.-O., Kuperwasser, N., DeYoung, M.P., and Ellisen, L.W.  
(2006). p63 mediates survival in squamous cell carcinoma by suppression of  
p73-dependent apoptosis. *Cancer Cell* 9, 45–56.
- Roe, J.S., Hwang, C.I., Somerville, T.D.D., Milazzo, J.P., Lee, E.J., Da Silva, B.,  
Maiorino, L., Tiriach, H., Young, C.M., Miyabayashi, K., et al. (2017). Enhancer  
Reprogramming Promotes Pancreatic Cancer Metastasis. *Cell* 170, 875–  
888.e20.
- Saldanha, A.J. (2004). Java Treeview—extensible visualization of microarray  
data. *Bioinformatics* 20, 3246–3248.
- Sheng, Q., Liu, X., Fleming, E., Yuan, K., Piao, H., Chen, J., Moustafa, Z.,  
Thomas, R.K., Greulich, H., Schinzel, A., et al. (2010). An activated ErbB3/  
NRG1 autocrine loop supports in vivo proliferation in ovarian cancer cells.  
*Cancer Cell* 17, 298–310.
- Shi, J., Wang, E., Milazzo, J.P., Wang, Z., Kinney, J.B., and Vakoc, C.R. (2015).  
Discovery of cancer drug targets by CRISPR-Cas9 screening of protein do-  
mains. *Nat. Biotechnol.* 33, 661–667.
- Shrestha, P., Muramatsu, Y., Kudaken, W., Mori, M., Takai, Y., Ilg, E.C.,  
Schafer, B.W., and Heizmann, C.W. (1998). Localization of Ca(2+)-bind-  
ing S100 proteins in epithelial tumours of the skin. *Virchows Arch.* 432,  
53–59.
- Siegel, R.L., Miller, K.D., and Jemal, A. (2018). Cancer statistics, 2018. *CA  
Cancer J. Clin.* 68, 7–30.
- Soares, E., and Zhou, H. (2018). Master regulatory role of p63 in epidermal  
development and disease. *Cell. Mol. Life Sci.* 75, 1179–1190.
- Su, X., Chakravarti, D., Cho, M.S., Liu, L., Gi, Y.J., Lin, Y.-L., Leung, M.L., El-  
Naggar, A., Creighton, C.J., Suraokar, M.B., et al. (2010). TAp63 suppresses  
metastasis through coordinate regulation of Dicer and miRNAs. *Nature* 467,  
986–990.
- Subramanian, A., Tamayo, P., Mootha, V.K., Mukherjee, S., Ebert, B.L.,  
Gillette, M.A., Paulovich, A., Pomeroy, S.L., Golub, T.R., Lander, E.S., and  
Mesirov, J.P. (2005). Gene set enrichment analysis: a knowledge-based  
approach for interpreting genome-wide expression profiles. *Proc. Natl.  
Acad. Sci. USA* 102, 15545–15550.
- Tadeu, A.M.B., and Horsley, V. (2013). Notch signaling represses p63 expres-  
sion in the developing surface ectoderm. *Development* 140, 3777–3786.
- Tarumoto, Y., Lu, B., Somerville, T.D.D., Huang, Y.-H., Milazzo, J.P., Wu, X.S.,  
Klingbeil, O., El Demerdash, O., Shi, J., and Vakoc, C.R. (2018). LKB1, Salt-  
Inducible Kinases, and MEF2C Are Linked Dependencies in Acute Myeloid  
Leukemia. *Mol. Cell* 69, 1017–1027.e6.
- The Cancer Genome Atlas Research Network (2017). Integrated genomic  
characterization of pancreatic ductal adenocarcinoma. *Cancer Cell* 32, 185–  
203.e13.
- Thomas-Chollier, M., Hufton, A., Heinig, M., O’Keeffe, S., Masri, N.E., Roeder,  
H.G., Manke, T., and Vingron, M. (2011). Transcription factor binding predic-  
tions using TRAP for the analysis of ChIP-seq data and regulatory SNPs.  
*Nat. Protoc.* 6, 1860–1869.
- Tiriach, H., Belleau, P., Engle, D.D., Plenker, D., Deschênes, A., Somerville,  
T.D.D., Froeling, F.E.M., Burkhart, R.A., Denroche, R.E., Jang, G.-H., et al.  
(2018). Organoid profiling identifies common responders to chemotherapy in  
pancreatic cancer. *Cancer Discov.* 8, 1112–1129.
- Trapnell, C., Williams, B.A., Pertea, G., Mortazavi, A., Kwan, G., van  
Baren, M.J., Salzberg, S.L., Wold, B.J., and Pachter, L. (2010). Transcript  
assembly and quantification by RNA-seq reveals unannotated transcripts  
and isoform switching during cell differentiation. *Nat. Biotechnol.* 28,  
511–515.
- Urosevic, J., Garcia-Albéniz, X., Planet, E., Real, S., Céspedes, M.V., Guiu, M.,  
Fernandez, E., Bellmunt, A., Gawrzak, S., Pavlovic, M., et al. (2014). Colon can-  
cer cells colonize the lung from established liver metastases through p38  
MAPK signalling and PTHLH. *Nat. Cell Biol.* 16, 685–694.
- Waugh, D.J.J., and Wilson, C. (2008). The interleukin-8 pathway in cancer.  
*Clin. Cancer Res.* 14, 6735–6741.
- Witkiewicz, A.K., McMillan, E.A., Balaji, U., Baek, G., Lin, W.C., Mansour, J.,  
Mollaei, M., Wagner, K.-U., Koduru, P., Yopp, A., et al. (2015). Whole-exome  
sequencing of pancreatic cancer defines genetic diversity and therapeutic  
targets. *Nat. Commun.* 6, 6744.
- Xi, Y., Kim, T., Brumwell, A.N., Driver, I.H., Wei, Y., Tan, V., Jackson, J.R., Xu,  
J., Lee, D.K., Gotts, J.E., et al. (2017). Local lung hypoxia determines epithelial  
fate decisions during alveolar regeneration. *Nat. Cell Biol.* 19, 904–914.
- Xu, Y., Milazzo, J.P., Somerville, T.D.D., Tarumoto, Y., Huang, Y.-H.,  
Ostrand, E.L., Wilkinson, J.E., Challen, G.A., and Vakoc, C.R. (2018). A  
TFIID-SAGA Perturbation that Targets MYB and Suppresses Acute Myeloid  
Leukemia. *Cancer Cell* 33, 13–28.e8.
- Yang, A., Kaghad, M., Wang, Y., Gillett, E., Fleming, M.D., Dötsch, V.,  
Andrews, N.C., Caput, D., and McKeon, F. (1998). p63, a p53 homologue at

3q27-29, encodes multiple products with transactivating, death-inducing, and dominant-negative activities. *Mol. Cell* 2, 305–316.

Ye, L.Y., Chen, W., Bai, X.L., Xu, X.Y., Zhang, Q., Xia, X.F., Sun, X., Li, G.G., Hu, Q.D., Fu, Q.H., and Liang, T.B. (2016). Hypoxia-Induced Epithelial-to-Mesenchymal Transition in Hepatocellular Carcinoma Induces an Immunosuppressive Tumor Microenvironment to Promote Metastasis. *Cancer Res.* 76, 818–830.

Young, A., Lou, D., and McCormick, F. (2013). Oncogenic and wild-type Ras play divergent roles in the regulation of mitogen-activated protein kinase signaling. *Cancer Discov.* 3, 112–123.

Zhang, J., Ji, J.Y., Yu, M., Overholtzer, M., Smolen, G.A., Wang, R., Brugge, J.S., Dyson, N.J., and Haber, D.A. (2009). YAP-dependent induction of amphiregulin identifies a non-cell-autonomous component of the Hippo pathway. *Nature Cell Biology* 11, 1444.



## STAR★METHODS

### KEY RESOURCES TABLE

| REAGENT or RESOURCE                                      | SOURCE                    | IDENTIFIER                       |
|----------------------------------------------------------|---------------------------|----------------------------------|
| <b>Antibodies</b>                                        |                           |                                  |
| Rabbit polyclonal anti-TP63 (for WB, IHC and ChIP)       | Cell Signaling            | Cat# 39692; RRID: N/A            |
| Rabbit polyclonal anti-KRT5/6 (for WB)                   | Millipore                 | Cat# MAB1620; RRID: AB_94292     |
| Rabbit polyclonal anti-S100A2 (for WB and HIC)           | Abcam                     | Cat# ab109494; RRID: AB_10859000 |
| ImmPRESS Horse-Anti-Rabbit Ig Reagent antibody (IHC)     | Vector                    | Cat# MP-7401; RRID: AB_2336529   |
| ImmPRESS Horse-Anti-Mouse Ig Reagent antibody (IHC)      | Vector                    | Cat# MP-7402; RRID: AB_2336528   |
| Mouse monoclonal anti-HSC70 (for WB)                     | Santa Cruz Biotechnology  | Cat# sc-7298; RRID: AB_627761    |
| Rabbit polyclonal anti-H3K27ac (for ChIP)                | Abcam                     | Cat# ab4729; RRID: AB_2118291    |
| Rabbit polyclonal anti-MYC (for ChIP)                    | Abcam                     | Cat# ab32072; RRID: AB_731658    |
| Mouse monoclonal anti-FLAG (for ChIP)                    | Sigma-Aldrich             | Cat# F1804; RRID: AB_262044      |
| <b>Chemicals, Peptides, and Recombinant Proteins</b>     |                           |                                  |
| 10% Neutral Buffered Formalin                            | Thermal Fisher Scientific | Cat# 22-110-869                  |
| 2-Mercaptoethanol                                        | Sigma-Aldrich             | Cat# M6250                       |
| Isopropanol                                              | Sigma-Aldrich             | Cat# 190674                      |
| 2x Laemmli Sample Buffer                                 | BIO-RAD                   | Cat# 1610737                     |
| Chloroform                                               | Sigma-Aldrich             | Cat# 288306                      |
| DNase I (RNase-free)                                     | New England Biolabs       | Cat# M0303S                      |
| Formaldehyde, 37% solution                               | Avantor                   | Cat# 2106-01                     |
| Glycine                                                  | Thermal Fisher Scientific | Cat# BP381-1                     |
| Penicillin/Streptomycin                                  | Thermal Fisher Scientific | Cat# 15140122                    |
| Polybrene                                                | EMD Millipore             | Cat# TR-1003-G                   |
| Polyethylenimine, Linear, MW 25,000 (PEI 25000)          | Polysciences              | Cat# 23966-1                     |
| TRIzol Reagent                                           | Thermo Fisher             | Cat# 15596018                    |
| D-Luciferin                                              | Goldbio                   | Cat# 115144-35-9                 |
| Geneticin Selective Antibiotic (G-418 Sulfate)           | Thermal Fisher Scientific | Cat# 10131035                    |
| Puromycin dihydrochloride                                | Sigma-Aldrich             | Cat# P8833                       |
| Blasticidin S HCl                                        | Thermal Fisher Scientific | Cat# A1113903                    |
| DMEM with 4.5 g/L glucose, L-glutamine & sodium pyruvate | Cellgro                   | Cat# 10-013-CV                   |
| Advanced DMEM/F12                                        | Life Technologies         | Cat# 12634-028                   |
| RPMI 1640 w/ L-glutamine                                 | Fisher Scientific         | Cat# MT10040CV                   |
| HEPES                                                    | Life Technologies         | Cat# 15630-130                   |
| Glutamax                                                 | Life Technologies         | Cat# 35050-079                   |
| AB3-01                                                   | Tocris Bioscience         | Cat# 2939                        |
| hEGF                                                     | PeptoTech                 | Cat# AF-100-15                   |
| mNoggin                                                  | PeptoTech                 | Cat# 250-38                      |
| hFGF10                                                   | PeptoTech                 | Cat# 100-26                      |
| hGastrin                                                 | Tocris Bioscience         | Cat# 3006                        |
| N-acetylcysteine                                         | Sigma-Aldrich             | Cat# A9165-5G                    |
| Nicotinamide                                             | Sigma-Aldrich             | Cat# N0636-100G                  |
| PGE2                                                     | Tocris Bioscience         | Cat# 2296                        |
| B27 supplement                                           | Life Technologies         | Cat# 17504044                    |
| R-Spondin 1 Cells                                        | Trevigen                  | Cat# 3710-001-K                  |

(Continued on next page)

| <b>Continued</b>                                                                  |                                          |                  |
|-----------------------------------------------------------------------------------|------------------------------------------|------------------|
| REAGENT or RESOURCE                                                               | SOURCE                                   | IDENTIFIER       |
| Afamin/Wnt3A conditioned media                                                    | Osaka University                         | N/A              |
| T4 DNA Polymerase                                                                 | New England Biolabs                      | Cat# M0203L      |
| DNA Polymerase I, Large (Klenow) Fragment                                         | New England Biolabs                      | Cat# M0201L      |
| T4 polynucleotide kinase                                                          | New England Biolabs                      | Cat# M0201L      |
| Klenow Fragment (3'-5' exo-)                                                      | New England Biolabs                      | Cat# M0212L      |
| ImmPACT DAB peroxidase (HRP) substrate                                            | Vector                                   | Cat# SK-4105     |
| Doxycycline hyclate                                                               | Sigma-Aldrich                            | Cat# D9891       |
| <b>Critical Commercial Assays</b>                                                 |                                          |                  |
| TruSeq RNA Sample Prep Kit v2                                                     | Illumina                                 | Cat# RS-122-2001 |
| TruSeq ChIP Sample Prep Kit                                                       | Illumina                                 | Cat# IP-202-1012 |
| Power SYBR Green Master Mix                                                       | Thermo Fisher Scientific                 | Cat# 4368577     |
| qScript cDNA SuperMix                                                             | Quanta bio                               | Cat# 95048-500   |
| SuperScript II Reverse Transcriptase                                              | Thermo Fisher                            | Cat# 18064014    |
| Agencourt AMPure XP                                                               | Beckman Coulter                          | Cat# A63880      |
| Dynabeads Protein A                                                               | Thermo Fisher Scientific                 | Cat# 10002D      |
| Dynabeads Protein G                                                               | Thermo Fisher Scientific                 | Cat# 10003D      |
| MiniElute PCR Purification Kit                                                    | QIAGEN                                   | Cat# 28004       |
| QIAquick Gel Extraction Kit                                                       | QIAGEN                                   | Cat# 28704       |
| Agilent High Sensitivity DNA Kit                                                  | Agilent Genomics                         | Cat# 5067-4626   |
| CellTiter-Glo Luminescent Cell Viability Assay                                    | Promega                                  | G7570            |
| Corning Matrigel Growth Factor Reduced (GFR) Basement Membrane Matrix, *LDEV-free | Life Sciences                            | Cat# 354230      |
| <b>Deposited Data</b>                                                             |                                          |                  |
| ChIP-seq and RNA-seq data                                                         | This paper                               | GEO: GSE115463   |
| PDAC patients microarray data                                                     | ( <a href="#">Moffitt et al., 2015</a> ) | GEO: GSE71729    |
| <b>Experimental Models: Cell Lines/Organoids</b>                                  |                                          |                  |
| Human PDA cell line PATU8988S                                                     | DSMZ                                     | Cat# ACC 204     |
| Human PDA cell line HPAFII                                                        | ATCC                                     | Cat# CRL-1997    |
| Human PDA cell line AsPC1                                                         | ATCC                                     | Cat# CRL-1682    |
| Human PDA cell line SUI2                                                          | JCRB                                     | JCRB1094         |
| Human PDA cell line CFPAC1                                                        | ATCC                                     | Cat# CRL-1918    |
| Human PDA cell line PANC1                                                         | ATCC                                     | Cat# CRL-1469    |
| Human PDA cell line MIAPaca2                                                      | ATCC                                     | Cat# CRL-1420    |
| Human PDA cell line BxPC3                                                         | ATCC                                     | Cat# CRL-1687    |
| Human HEK293T                                                                     | CSHL                                     | N/A              |
| Human normal pancreas organoid hN30                                               | ( <a href="#">Tiriac et al., 2018</a> )  | N/A              |
| Human normal pancreas organoid hN34                                               | ( <a href="#">Tiriac et al., 2018</a> )  | N/A              |
| Human normal pancreas organoid hN35                                               | ( <a href="#">Tiriac et al., 2018</a> )  | N/A              |
| Human PDA organoid hF3                                                            | ( <a href="#">Tiriac et al., 2018</a> )  | N/A              |
| Human PDA organoid hT85                                                           | ( <a href="#">Tiriac et al., 2018</a> )  | N/A              |
| Human PDA organoid hF2                                                            | ( <a href="#">Tiriac et al., 2018</a> )  | N/A              |
| Human PDA organoid hT3                                                            | ( <a href="#">Tiriac et al., 2018</a> )  | N/A              |
| Murine PDA cell line FC1199                                                       | David Tuveson                            | N/A              |
| Murine PDA cell line FC1242                                                       | David Tuveson                            | N/A              |
| Murine PDA cell line FC1245                                                       | David Tuveson                            | N/A              |
| <b>Experimental Models: Organisms/Strains</b>                                     |                                          |                  |
| Mouse: NSG                                                                        | The Jackson Laboratory                   | Stock # 005557   |

(Continued on next page)

**Continued**

| REAGENT or RESOURCE                                       | SOURCE                                           | IDENTIFIER                                                                                                                                                                                                                                          |
|-----------------------------------------------------------|--------------------------------------------------|-----------------------------------------------------------------------------------------------------------------------------------------------------------------------------------------------------------------------------------------------------|
| Oligonucleotides                                          |                                                  |                                                                                                                                                                                                                                                     |
| sgRNA/shRNA/RT-PCR sequences see <a href="#">Table S7</a> | This paper                                       | N/A                                                                                                                                                                                                                                                 |
| Recombinant DNA                                           |                                                  |                                                                                                                                                                                                                                                     |
| deltaNp63alpha-FLAG                                       | ( <a href="#">Chatterjee et al., 2008</a> )      | Addgene plasmid #26979                                                                                                                                                                                                                              |
| LentiV-ΔNp63-FLAG-neo                                     | This paper                                       | N/A                                                                                                                                                                                                                                                 |
| Lenti-luciferase-blast                                    | This paper                                       | N/A                                                                                                                                                                                                                                                 |
| LentiV-Cas9-puro                                          | ( <a href="#">Tarumoto et al., 2018</a> )        | Addgene plasmid #108100                                                                                                                                                                                                                             |
| LRNG (Lenti_sgRNA_EFS_Neo-IRES-GFP)                       | ( <a href="#">Roe et al., 2017</a> )             | N/A                                                                                                                                                                                                                                                 |
| LRG2.1                                                    | ( <a href="#">Tarumoto et al., 2018</a> )        | Addgene plasmid #108098                                                                                                                                                                                                                             |
| LEPG (LTR-miRE-shRNA-PGK-puro-IRES-GFP)                   | ( <a href="#">Fellmann et al., 2013</a> )        | Addgene plasmid #111160                                                                                                                                                                                                                             |
| psPAX2                                                    | N/A                                              | Addgene plasmid #12260                                                                                                                                                                                                                              |
| TREtight-ΔNp63-EFS-rtTA-P2A-Puro                          | This paper                                       | N/A                                                                                                                                                                                                                                                 |
| TREtight-GFP-EFS-rtTA-P2A-Puro                            | This paper                                       | N/A                                                                                                                                                                                                                                                 |
| Software and Algorithms                                   |                                                  |                                                                                                                                                                                                                                                     |
| MACS 1.4.2                                                | ( <a href="#">Feng et al., 2012</a> )            | <a href="http://liulab.dfci.harvard.edu/MACS/00README.html">http://liulab.dfci.harvard.edu/MACS/00README.html</a>                                                                                                                                   |
| SAMtools 1.4                                              | ( <a href="#">Li et al., 2009</a> )              | <a href="http://samtools.sourceforge.net">http://samtools.sourceforge.net</a>                                                                                                                                                                       |
| BEDTools 2.22.1                                           | ( <a href="#">Quinlan and Hall, 2010</a> )       | <a href="https://bedtools.readthedocs.io/en/latest/">https://bedtools.readthedocs.io/en/latest/</a>                                                                                                                                                 |
| TRAP                                                      | ( <a href="#">Thomas-Chollier et al., 2011</a> ) | <a href="http://trap.molgen.mpg.de/cgi-bin/home.cgi/home.cgi">http://trap.molgen.mpg.de/cgi-bin/home.cgi/home.cgi</a>                                                                                                                               |
| HOMER v4.9                                                | ( <a href="#">Heinz et al., 2010</a> )           | <a href="http://homer.ucsd.edu/homer/">http://homer.ucsd.edu/homer/</a>                                                                                                                                                                             |
| HISAT2                                                    | ( <a href="#">Kim et al., 2015</a> )             | <a href="http://ccb.jhu.edu/software/hisat2/index.shtml">http://ccb.jhu.edu/software/hisat2/index.shtml</a>                                                                                                                                         |
| Cufflinks                                                 | ( <a href="#">Trapnell et al., 2010</a> )        | <a href="http://cole-trapnell-lab.github.io/cufflinks/">http://cole-trapnell-lab.github.io/cufflinks/</a>                                                                                                                                           |
| Morpheus                                                  | Broad Institute                                  | <a href="https://software.broadinstitute.org/morpheus/">https://software.broadinstitute.org/morpheus/</a>                                                                                                                                           |
| UCSC Genome Browser                                       | UCSC                                             | <a href="http://genome.ucsc.edu">http://genome.ucsc.edu</a>                                                                                                                                                                                         |
| GSEA                                                      | ( <a href="#">Subramanian et al., 2005</a> )     | <a href="http://software.broadinstitute.org/gsea/index.jsp">http://software.broadinstitute.org/gsea/index.jsp</a>                                                                                                                                   |
| Bowtie2                                                   | ( <a href="#">Langmead and Salzberg, 2012</a> )  | <a href="http://bowtie-bio.sourceforge.net/bowtie2/index.shtml">http://bowtie-bio.sourceforge.net/bowtie2/index.shtml</a>                                                                                                                           |
| GREAT                                                     | ( <a href="#">McLean et al., 2010</a> )          | <a href="http://bejerano.stanford.edu/great/public/html/">http://bejerano.stanford.edu/great/public/html/</a>                                                                                                                                       |
| ImageJ                                                    | NIH                                              | <a href="https://imagej.nih.gov/ij/">https://imagej.nih.gov/ij/</a>                                                                                                                                                                                 |
| GraphPad PRISM 6                                          | GraphPad Software                                | <a href="https://www.graphpad.com/scientific-software/prism/">https://www.graphpad.com/scientific-software/prism/</a>                                                                                                                               |
| Living Image Software                                     | PerkinElmer                                      | <a href="http://www.perkinelmer.com/lab-products-and-services/resources/in-vivo-imaging-software-downloads.html#LivingImage">http://www.perkinelmer.com/lab-products-and-services/resources/in-vivo-imaging-software-downloads.html#LivingImage</a> |
| TreeView                                                  | ( <a href="#">Saldanha, 2004</a> )               | <a href="http://jtreeview.sourceforge.net">http://jtreeview.sourceforge.net</a>                                                                                                                                                                     |
| CBioPortal                                                | ( <a href="#">Cerami et al., 2012</a> )          | <a href="http://www.cbioportal.org">http://www.cbioportal.org</a>                                                                                                                                                                                   |
| The International Cancer Genome Consortium                | ICGC                                             | <a href="https://dcc.icgc.org">https://dcc.icgc.org</a>                                                                                                                                                                                             |
| GTEPortal                                                 | ( <a href="#">GTE Consortium, 2015</a> )         | <a href="http://gtportal.org/home/">http://gtportal.org/home/</a>                                                                                                                                                                                   |

**CONTACT FOR REAGENT AND RESOURCE SHARING**

Further information and requests for resources and reagents should be directed to and will be fulfilled by the Lead Contact, Christopher Vakoc ([vakoc@cshl.edu](mailto:vakoc@cshl.edu)).

**EXPERIMENTAL MODEL AND SUBJECT DETAILS**

**Mice**

All animal procedures and studies were approved by the Cold Spring Harbor Laboratory Animal Care and Use Committee in accordance to IACUC. Six- to ten-week old female NSG mice used for transplant studies were purchased from the Jackson Laboratory.

**Cell Lines**

PATU8988S, HPAFII, AsPC1, SUI2, CFPAC1, PANC1, MIAPaca2 and BxPC3 cells were cultured in RPMI supplemented with 10% FBS (R10). FC1199, FC1242 and FC245 were derived from KPC (Kras<sup>+</sup>/LSL-G12D; Trp53<sup>+</sup>/LSL-R172H; Pdx1-Cre) mice and cultured in DMEM with 10% FBS. hN30, N34, hN35, hT85, hF2 and hF3 (human organoid samples) were established and cultured as

described in detail elsewhere (Tiriach et al., 2018). Briefly, cells were plated with Matrigel and grown in Human complete Feeding Medium (hCPLT): advanced DMEM/F12, HEPES 10mM, Glutamax 1X, A83-01 500nM, hEGF 50ng/mL, mNoggin 100ng/mL, hFGF10 100ng/mL, hGastrin I 0.01  $\mu$ M, N-acetylcysteine 1.25mM, Nicotinamide 10mM, PGE2 1  $\mu$ M, B27 supplement 1X final, R-spondin1 conditioned media 10% final, Afamin/Wnt3A conditioned media 50% final. HEK293T cells were cultured in DMEM with 10% FBS. Penicillin/streptomycin were added to all cell culture. HEK293T cells were used for packaging lentivirus using poly-ethylenimine (PEI)-mediated transfection.

## METHOD DETAILS

### Plasmid Construction

For generation of the LentiV- $\Delta$ Np63-neo vector,  $\Delta$ Np63 cDNA from the deltaNp63-FLAG vector (addgene #26979) (Chatterjee et al., 2008) was subcloned to LentiV-Cas9-puro vector (addgene #108100) (Tarumoto et al., 2018) in place of Cas9 and the puromycin resistance cassette was replaced with a neomycin resistance cassette. For the LentiV-neo empty vector, Cas9 was replaced with a 3\*FLAG sequence (Xu et al., 2018). For generation of the LentiV- $\Delta$ Np63-FLAG-neo vector, a 3\*FLAG sequence was added to the C terminus of  $\Delta$ Np63 cDNA in the LentiV- $\Delta$ Np63-neo vector. To generate Lenti-luciferase-blast vector the luciferase transgene from Lenti-luciferase-P2A-Neo vector (addgene #105621) to a vector with blasticidin resistance. For experiments involving dox-regulated expression, cells were infected with  $\Delta$ Np63 or GFP cDNA in the dox-regulated vector YXP (TREtight-cDNA-EFS-rtTA-P2A-Puro) and selected with puromycin (3  $\mu$ g/ml).

### Lentiviral Production and Infection

Lentivirus was produced in HEK293T cells by transfecting plasmids and packaging plasmids (VSVG and psPAX2) using PEI. Media was replaced with R10 media 6-8 hours following transfection and lentivirus-containing supernatant was subsequently collected every 12 hours for 48 hours prior to filtration through a 0.45  $\mu$ m filter. For infection of cells, cell suspensions were mixed with lentiviral-containing supernatant supplemented with polybreane to a final concentration of 4  $\mu$ g/ml. Cells were plated in tissue culture plates of the appropriate size and lentiviral-containing supernatant was replaced with fresh media after an incubation period of 6-8 hours.

### In Vitro Phenotypic Assays

SUIT2 cells were first infected with  $\Delta$ Np63 cDNA in LentiV- $\Delta$ Np63-neo vector or the empty vector as a control. Two days post infection, transduced cells were selected with 1 mg/ml of G418 and on day seven post infection, cells were counted by trypan blue exclusion and used for the assays described below.

For cell growth assays, 200 cells were plated in quadruplicate in 20  $\mu$ L of media in each well of a 384-well plate. Quantification of viable cells was determined every 24 hours post seeding for a total of six days using CellTiterGlo Luminescent Cell Viability Assay kit (Promega) and a SpectraMax plate reader (Molecular Devices) following the manufacturer's protocol.

For 3D Matrigel colony formation assays, 5,000 cells were resuspended in 1ml RPMI supplemented with 5% Matrigel and 2% FBS and plated in triplicate in each well of an ultra-low attachment 24-well plate (Corning). Bright field images were captured on day seven post plating and colony size and number were quantified from four 4x images per well using ImageJ software (NIH).

For scratch assays, cells were first plated to confluency in triplicate in wells of a standard 24-well plate. At day 0 of the assay, a wound was applied down the center of the well using a pipette tip. Media was subsequently removed and cells washed with PBS before addition of 1ml serum-free RPMI. Bright field images were captured using a 4x objective immediately (0 hours) and then at 6 hours and 24 hours post plating. Area of the wound was quantified using ImageJ software (NIH).

### CRISPR-Based Targeting

For GFP-depletion assays, cells stably expressing Cas9 in LentiV-Cas9-puro vector were infected with sgRNAs in LRG2.1 vector (addgene #108098). GFP% was measured on day three (P0) and then every three days post viral transduction until the end of the experiment.

For RNA-seq experiments of CRISPR based targeting of TP63 in BxPC3 cells, BxPC3 cells stably expressing Cas9 were infected with control or TP63 sgRNAs in LRNG vector. Two days post infection with sgRNAs, transduced cells were selected with 1mg/ml of G418 and on day five post infection cells were used for RNA-seq analysis.

For CRISPR based targeting of TP63 in BxPC3 cells *in vivo*, please refer to the *in vivo* transplantation experiments section. sgRNA sequences can be found in Table S7.

### shRNA targeting in BxPC3 cells and hF3 organoids

shRNAs targeting TP63 or control were cloned into the miR-E-based retroviral shRNA expression vector LEPG (LTR-miRE-shRNA-PGK-puro-IRES-GFP) (addgene #111160) (Fellmann et al., 2013). For GFP depletion assays in BxPC3 cells, GFP% was measured on day three (P0) and then every three days post viral transduction until the end of the experiment. For cell growth assays in hF3 organoids, cells were first infected with the appropriate lentiviral supernatant and at three days post infection, transduced cells were selected with 2  $\mu$ g/ml of puromycin for five days. On day eight post infection, cells were counted by trypan blue exclusion and

500 cells were plated in triplicate in 30  $\mu$ L of hCPLT media supplemented with 10% Matrigel in each well of a 384-well plate. Quantification of viable cells was determined every 24 hours post seeding for a total of seven days using CellTiterGlo Luminescent Cell Viability Assay kit (Promega) and a SpectraMax plate reader (Molecular Devices) following the manufacturer's protocol.

For RNA-seq experiments of shRNA-mediated targeting of TP63 in BxPC3 cells and hF3 organoids, cells were infected with control or TP63 shRNAs in MLS-E vector and at two days (for BxPC3 cells) or three days (for hF3 organoids) post infection with shRNAs, transduced cells were selected with 2  $\mu$ g/ml of puromycin and on day five (for BxPC3 cells) or day eight (for hF3 organoids) post infection cells were used for RNA-seq analysis. shRNA sequences can be found in [Table S7](#).

### **In Vivo Transplantation Experiments**

All animal procedures and studies were approved by the Cold Spring Harbor Laboratory Animal Care and Use Committee in accordance to IACUC.

For CRISPR-mediated targeting of TP63 in BxPC3 cells *in vivo*, BxPC3 cells stably expressing Cas9 were first infected with a luciferase transgene in Lenti-luciferase-blast vector and a stable cell line was generated by selection with 10  $\mu$ g/ml blasticidin. These cells were subsequently infected with control or TP63 sgRNA in LRNG vectors. Two days post infection with sgRNAs, transduced cells were selected with 1mg/ml of G418 for three days and on day five post infection, cells were counted by trypan blue exclusion, resuspended in PBS and kept on ice prior to transplantation.

For *in vivo* experiments using reprogrammed SUIT2 cells, parental SUIT2 cells were first infected with a luciferase transgene in Lenti-luciferase-blast vector and a stable cell line was generated by selection with 10  $\mu$ g/ml blasticidin. These cells were subsequently infected  $\Delta$ Np63 cDNA in LentiV- $\Delta$ Np63-neo vector or the empty vector as a control. Two days post infection, transduced cells were selected 1 mg/ml of puromycin for three days and on day five post infection, cells were counted by trypan blue exclusion, resuspended in PBS and kept on ice prior to transplantation.

For lung colonization assays, 100,000 viable SUIT2 cells or 250,000 viable BxPC3 cells in 200  $\mu$ L PBS were injected into the tail vein of NSG mice and bioluminescence imaging was initiated on day seven post transplantation.

Orthotopic transplants of cells into the pancreas of mice were performed as previously described ([Aiello et al., 2016](#)). Briefly, 50,000 viable SUIT2 cells or 100,000 viable BxPC3 cells in 50  $\mu$ L of PBS were slowly injected into the body of the pancreas. Following bleb formation, the pancreas was carefully put back in place before suturing the peritoneal cavity and closing the skin incision using wound clips. Wound clips were removed on day seven post transplantation prior to bioluminescence imaging.

For bioluminescence imaging, mice were intraperitoneally (IP) injected with D-Luciferin (50mg/kg) and analyzed using an IVIS Spectrum system (Caliper Life Sciences) ten minutes post IP injection.

### **Histology and Immunohistochemistry**

For histological and immunohistochemical analysis of mouse tissues, tissues were fixed in 10% neutral buffered formalin at room temperature for 24 hours and washed with 70% ethanol. Samples were then processed and subjected to H&E staining following standard protocol at the CSHL histology core facility. For immunohistochemical analysis, 6  $\mu$ m FFPE tissues sections were deparaffinized and rehydrated prior to steam based antigen retrieval in citrate buffer (pH 6.0). Sections were washed with dH<sub>2</sub>O prior to 10 minute incubation with 3% H<sub>2</sub>O<sub>2</sub> to block endogenous peroxidase activity. Following 5 minutes rinse with dH<sub>2</sub>O, sections were incubated with 2.5% normal horse serum (Vector) for 1 hour at room temperature. Sections were subsequently incubated with 100  $\mu$ L of primary antibody at the following dilutions in TBST: anti-TP63 (1:500), anti-KRT5/6 (1:200) or anti-S100A2 (1:250). Following washes, sections were then incubated for 1 hour at room temperature with HRP-linked horse-anti-mouse (for anti-KRT5/6) or horse-anti-rabbit (for anti-TP63 and anti-S100A2) secondary antibodies. Following further wash steps antigen labeling was performed using ImmPACT DAB (3,3'-diaminobenzidine) peroxidase substrate kit (Vector) with 1-2 minute incubation. Sections were washed thoroughly, hematoxylin counterstained, dehydrated and coverslipped. Images were taken on an Axio Imager.A2 (ZEISS) microscope with a 20x objective.

### **Cell Lysate Preparation for Western Blot Analysis**

Cell cultures were collected and 1 million cells were counted by trypan blue exclusion and washed with ice cold PBS. Cells were then resuspended in 100  $\mu$ L PBS and lysed with 100  $\mu$ L of 2x Laemmli Sample Buffer supplemented with  $\beta$ -mercaptoethanol by boiling for 30 minutes.

### **RNA Extraction and RT-PCR**

Total RNA was extracted using TRIzol reagent following the manufacturer's instructions. For RNA extraction from organoid samples, organoids were lysed by adding TRIzol reagent directly to the Matrigel dome. 1-2  $\mu$ g of total RNA was treated with DNaseI and reverse transcribed to cDNA using qScript cDNA SuperMix, followed by RT-qPCR analysis with SYBR green PCR master mix on an ABI 7900HT fast real-time PCR system.

### **RNA-seq Library Construction**

RNA-seq libraries were constructed using the TruSeq sample Prep Kit V2 (Illumina) according to the manufacturer's instructions. Briefly, 2  $\mu$ g of purified RNA was poly-A selected and fragmented with fragmentation enzyme. cDNA was synthesized with Super

Script II master mix, followed by end repair, A-tailing and PCR amplification. RNA-seq libraries were single-end sequenced for 50bp using an Illumina HighSeq2500 or NextSeq platform (Cold Spring Harbor Genome Center, Woodbury).

### ChIP and ChIP-Seq Library Construction

Cell cultures and organoid cultures were collected as single cell suspensions and were crosslinked in 1% formaldehyde at room temperature for 20 min and the reaction was then quenched using 0.125M glycine. 5-10 million cells were incubated with cell lysis buffer (10 mM Tris pH8.0, 10 mM NaCl, 0.2% NP-40) and then resuspended and sonicated in 500  $\mu$ L of nuclei lysis buffer (50 mM Tris pH8.0, 10 mM EDTA, 1% SDS) for 15 min using a BioRuptor water bath sonicator (medium setting, 30 s ON/OFF cycles). 500  $\mu$ L of sonicated chromatin from 5-10 million cells was diluted with 7.5ml of IP-Dilution buffer (20 mM Tris pH 8.0, 2 mM EDTA, 150 mM NaCl, 1% Triton X-100, 0.01% SDS) and incubated with 2  $\mu$ g of the appropriate antibody and 25  $\mu$ L of magnetic beads (protein A beads for rabbit antibody, protein G beads for mouse antibody) at 4°C overnight. After washing once with 1ml IP-wash 1 buffer (20 mM Tris pH8.0, 2 mM EDTA, 50 mM NaCl, 1% Triton X-100, 0.1% SDS), twice with 1ml High-salt buffer (20 mM Tris pH 8.0, 2 mM EDTA, 500 mM NaCl, 1% Triton X-100, 0.01% SDS), once with 1ml IP-wash 2 buffer (10 mM Tris pH 8.0, 1 mM EDTA 0.25 M LiCl, 1% NP-40, 1% sodium deoxycholate), twice with 1ml TE buffer (10 mM Tris-Cl, 1 mM EDTA, pH 8.0), beads bound to chromatin were eluted in 200  $\mu$ L nuclei lysis buffer by heating at 65°C for 15 min at 1000rpm. 12  $\mu$ L of 5M NaCl and 2  $\mu$ L RNaseA (stock at 1mg/ml) was then added to the 200  $\mu$ L eluted chromatin, followed by incubation at 65°C overnight for reverse cross-linking. DNA was subsequently treated with proteinase K for 2 hours at 42°C and then purified using a QIAGEN PCR purification kit.

ChIP-seq library was constructed using Illumina TruSeq ChIP Sample Prep kit following manufacture's protocol. Briefly, ChIP DNA was end repaired, followed by A-tailing and size selection (300-500bp) by gel electrophoresis using a 2% gel. 15 PCR cycles were used for final library amplification which was analyzed on a Bioanalyzer using a high sensitivity DNA chip (Agilent). ChIP-seq libraries were single-end sequenced for 50bp using an Illumina NextSeq platform (Cold Spring Harbor Genome Center, Woodbury).

### RNA-Seq Data Analysis

Single end 50bp sequencing reads were mapped to the hg19 genome using HISAT2 (Kim et al., 2015). Structural RNA was masked and differentially expressed genes were identified using Cuffdiff (Trapnell et al., 2010). All the following analysis was performed on genes with an RPKM value no less than 2 in either control or experimental samples. For RNA-seq following CRISPR based targeting of TP63 in BxPC3 cells, fold-change in RPKM was calculated as the ratio of the mean RPKM value of two independent TP63 sgRNAs to the RPKM value of the control sgRNA. For RNA-seq following ectopic expression of  $\Delta$ Np63 in PATU8988S or SUIT2 cells, fold-change in RPKM was calculated as ratio of mean RPKM value of samples expressing  $\Delta$ Np63 from two biological repeats to the mean RPKM value of control samples infected with an empty vector.

RNA-seq analysis of patient samples was performed using data extracted from Bailey et al. (2016). Only protein coding genes with a cpm value greater than 4 in at least 10% of the 96 patient samples for which RNA-seq data was available were used. The top 500 and bottom 500 genes passing this expression threshold in Squamous versus Progenitor samples, as defined by Bailey et al. (2016), defined the Squamous-PDA and Progenitor-PDA Identity signatures, respectively. To generate a ranked gene list for Pre-ranked gene set enrichment analysis (GSEA) (Subramanian et al., 2005), genes were ranked by their mean log<sub>2</sub> fold change in Squamous versus Progenitor PDA patient samples. Heatmaps of standardized expression values were generated using Morpheus from the Broad Institute.

### ChIP-Seq Analysis

Single end 50bp sequencing reads were mapped to the hg19 genome using Bowtie2 with default settings (Langmead and Salzberg, 2012). After removing duplicated mapped reads using SAM tools (Li et al., 2009), MACS 1.4.2 was used to call peaks using input genomic DNA as control (Feng et al., 2012). Only peaks enriched greater than or equal to 10-fold over input samples were used for subsequent analyses. Annotation of ChIP-seq peaks was performed using HOMER v4.9 with default settings (Heinz et al., 2010).

For unsupervised hierarchical clustering of the nine cell cultures representing human PDA and normal ducts, H3K27ac peaks from all samples were combined using the mergePeaks tool from HOMER v4.9 using default settings (-d given). This yielded a union of all H3K27ac peaks (n = 68,043). ChIP-seq tag counts were then recalculated at these intervals using MultCovBed from BEDTools (Quinlan and Hall, 2010) and were normalized to a read depth of 10 million uniquely mapped reads. Normalized H3K27ac tag counts were then used to generate a heatmap of similarity matrix by Pearson correlation, which was subsequently clustered by Euclidean distance with average linkage using Morpheus from the Broad Institute.

To define 'Squamous Elements', regions with greater than 1 tag per million in either hF3 or BxPC3 cells were used to calculate the ratio of the H3K27ac tag counts in hF3 or BxPC3 cells versus the mean tag counts across the other seven cultures. Those regions found to be greater than 5-fold increased in both hF3 and BxPC3 cells were defined as Squamous Elements (n = 1,336). A randomized set of 1,336 regions from the union of all H3K27ac peaks across the nine cultures were used as control regions (Random elements).

Heatmap density plots were made by first generating a density matrix by mapping sequencing reads from each ChIP-seq experiment to the 200 100bp bins around the center of a defined set of H3K27ac regions, i.e., Squamous elements, Random elements or All elements, with the latter defined as all H3K27ac peaks from the parental cell line. TreeView software was used to generate the heatmap from the density matrix and the contrast was adjusted proportionally to the total uniquely mapped reads for visual comparison across samples (Saldanha, 2004).

For calculating fold-change of H3K27ac tag counts following CRISPR based targeting of TP63 in BxPC3 cells, the following analysis was performed. First, H3K27ac peaks from cells infected with control and the two independent TP63 sgRNAs were combined using the mergePeaks tool to yield a union of all H3K27ac peaks in BxPC3 cells. ChIP-seq tag counts were then recalculated and normalized to a read depth of 1 million uniquely mapped reads. Regions with greater than or equal to 5 tags per million in either control or TP63 knockout samples were then used to calculate the fold-change in tags as the ratio of the mean tag count of the two independent TP63 sgRNAs to the tag count in the control sample. Regions that decreased greater than 3-fold following TP63 knockout were defined as repressed ( $n = 741$ ) and those that increased greater than 3-fold were defined as activated ( $n = 330$ ). The same pipeline was used for calculating fold-change of H3K27ac tag counts following ectopic  $\Delta$ Np63 expression in SUIT2 cells compared to those infected with an empty vector control. Those H3K27ac regions that increased greater than 3-fold in  $\Delta$ Np63 cells versus controls were defined as activated ( $n = 1,335$ ) and those that decreased greater than 3-fold were defined as repressed ( $n = 79$ ).

For GSEA analysis, the nearest expressed genes ( $\text{RPKM} \geq 2$ ) in hF3 or BxPC3 cells to Squamous Elements were first identified using Genomic Regions Enrichment of Annotations Tool (GREAT) (McLean et al., 2010). If the two nearest genes had an  $\text{RPKM} < 2$  in both hF3 and BxPC3 cells, the peak was abandoned. This yielded 668 genes that were used for GSEA using the ranked gene list prepared from the analysis of Squamous versus Progenitor PDA patient samples.

Ontology analysis of Squamous elements and Random elements was also performed using GREAT with whole genome set as background using the basal plus extension setting.

For TRAP analysis (Thomas-Chollier et al., 2011), DNA sequences flanking 500bp from the center of each H3K27ac peak were extracted from the hg19 genome using the UCSC table browser. These regions served as the input to find enriched JASPAR vertebrate motifs with human promoters as the background using the Benjamini-Hochber correction. Fold enrichment was calculated as the ratio +1 of the observed  $p$  value ( $-\log_{10}$ ) at Squamous versus Random elements.

For TP63 ChIP-seq analysis in BxPC3 cells, motif discovery was performed on all peaks using MEME-ChIP from the MEME Suite (Bailey et al., 2009). Annotation of ChIP-seq peaks was performed using HOMER v4.9 with default settings (Heinz et al., 2010).

## QUANTIFICATION AND STATISTICAL ANALYSIS

Statistical significance was evaluated by  $p$  value from two-tailed Student's  $t$  test or ANOVA using Prism software as indicated in the figure legends. Data are presented as mean with SEM and statistical significance of  $p$  value is indicated in figure legends. Unless otherwise stated in the figure legend,  $n$  refers to the number of biological repeats. For Kaplan-Meier survival curves, the log rank (Mantel-Cox) test was used to estimate median overall survival and statistical significance. Survival data were obtained from the CBioPortal (TCGA-PAAD) (Cerami et al., 2012), ICGC Data Portal (PACA-AU) (Bailey et al., 2016) or from the study by Moffitt et al. (2015). Survival data from the CBioPortal and the ICGC Data Portal data were downloaded in January 2018. For the TCGA-PAAD study, only the 150 confirmed PDA cases were used for the analyses in this study (The Cancer Genome Atlas Research Network, 2017).

## DATA AND SOFTWARE AVAILABILITY

The accession number for the ChIP-seq and RNA-seq data reported in this paper is GEO: GSE115463.

**Cell Reports, Volume 25**

**Supplemental Information**

**TP63-Mediated Enhancer Reprogramming**

**Drives the Squamous Subtype**

**of Pancreatic Ductal Adenocarcinoma**

**Tim D.D. Somerville, Yali Xu, Koji Miyabayashi, Hervé Tiriac, Cristian R. Cleary, Diogo Maia-Silva, Joseph P. Milazzo, David A. Tuveson, and Christopher R. Vakoc**



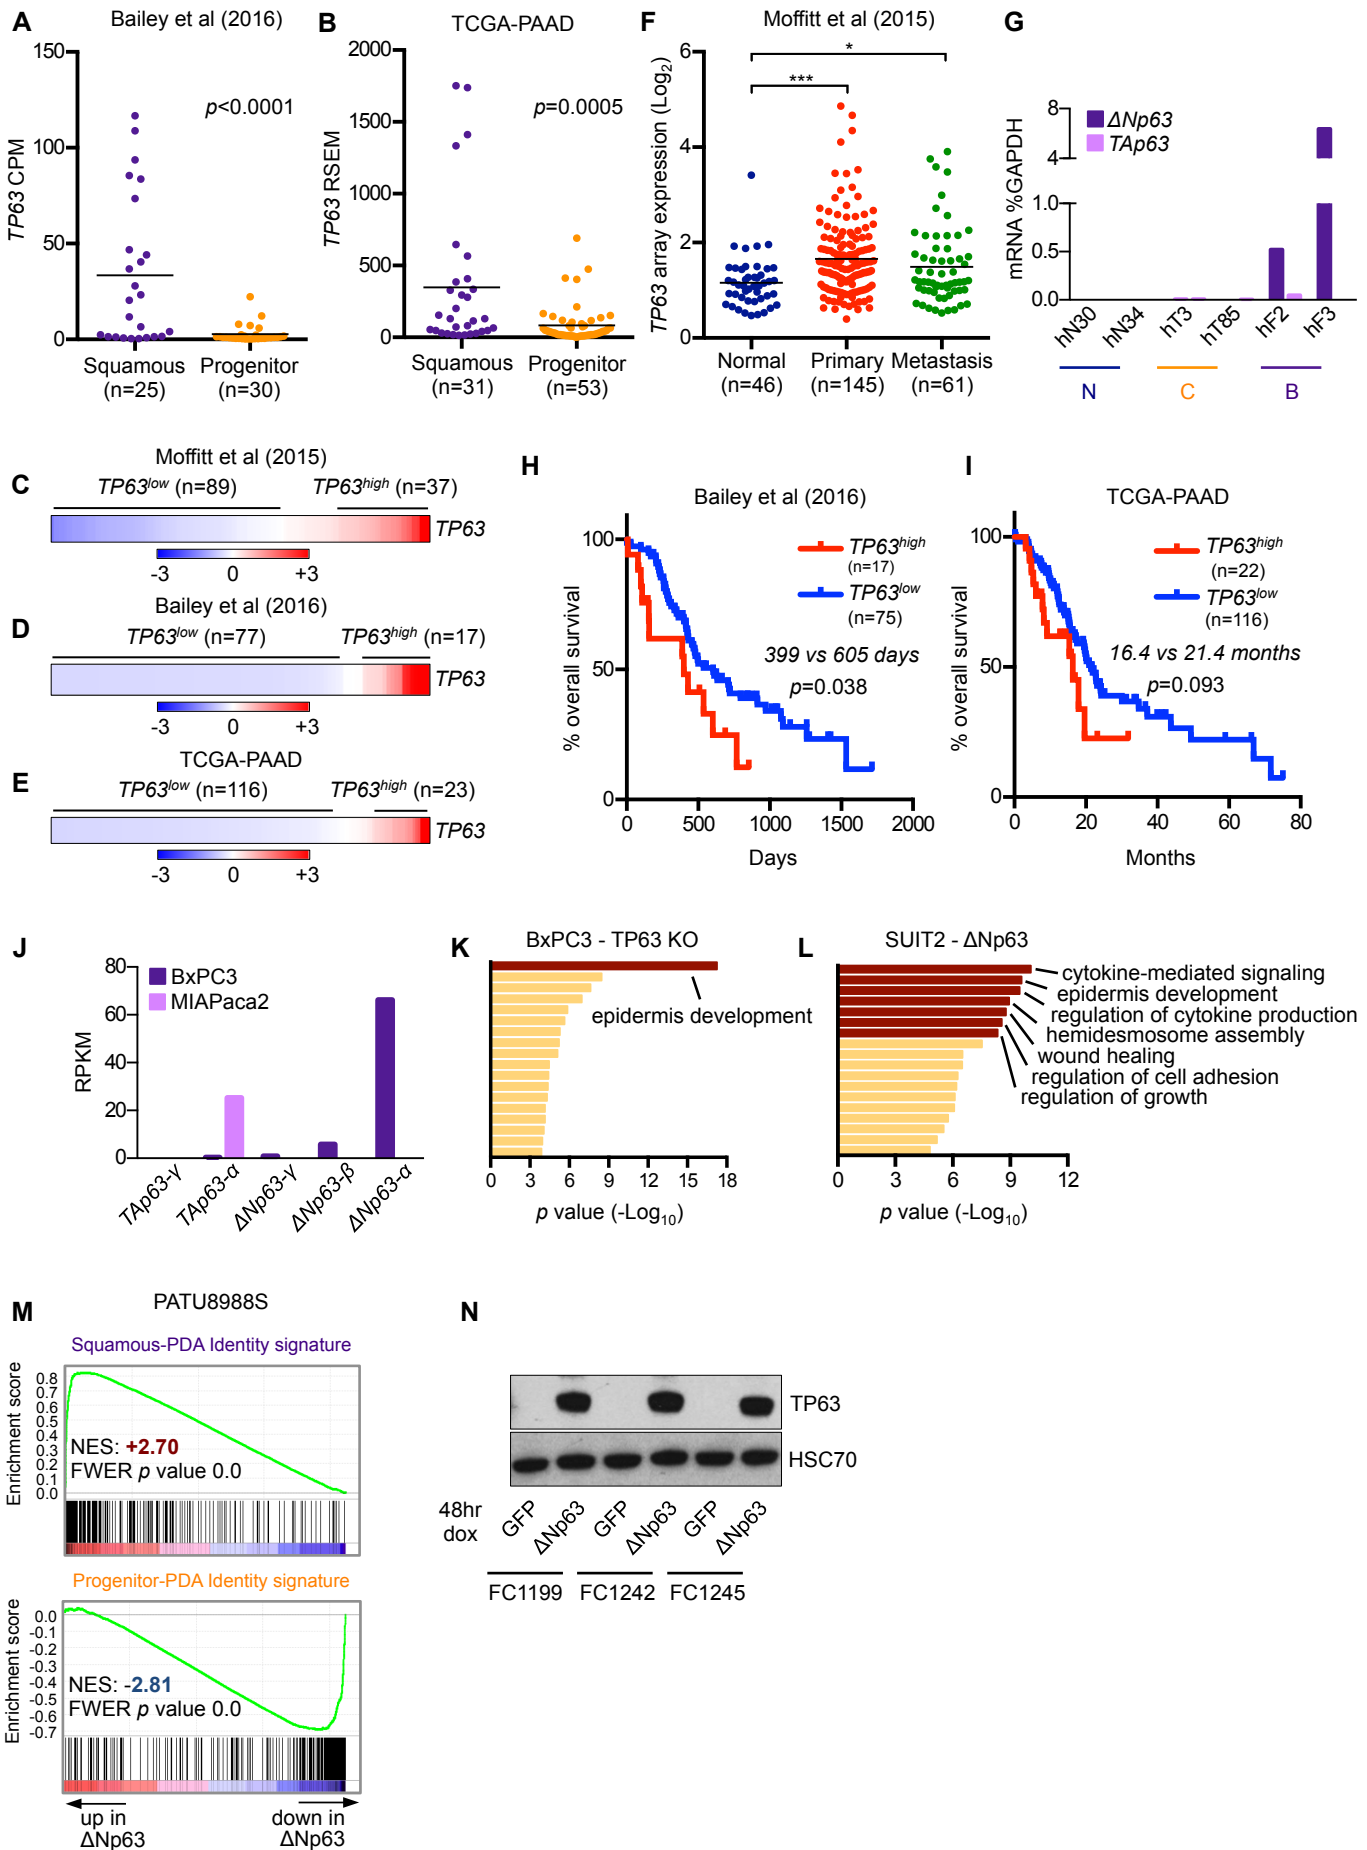

**Figure S1. *TP63* is Aberrantly Expressed in a Subset of Pancreatic Tumors that Display a Squamous-like Transcriptional Signature and is Necessary to Drive Progenitor-to-Squamous Transcriptional Reprogramming in Human PDA cells. Related to Figure 1.**

(A-B) Dot plots show *TP63* expression values in the indicated molecular subtypes in the indicated studies. Each dot represents one patient sample. *p* value was calculated using unpaired Student's t test.

(C-E) Heat maps show *TP63* expression across the indicated studies. In each study, samples were designated as *TP63*<sup>high</sup> or *TP63*<sup>low</sup> based on z-score expression values >0.35 or <0, respectively. Scale bar indicates the standardized expression value.

(F) *TP63* expression in normal pancreas, primary tumor and metastatic PDA samples. Data are from the study by Moffitt et al (2015). \**p* <0.05, \*\*\**p* <0.0001 by unpaired Student's t test.

(G) Isoform expression of *TP63* in human organoid samples. Bar chart shows RT-qPCR analysis of  $\Delta Np63$  or *TAp63* isoform expression in human organoids derived from normal pancreas 'N' or tumor samples assigned to the classical 'C' or basal-like 'B' molecular subtypes from the study by Tiriac et al (2018).

(H-I) Survival curves of patients from the indicated studies stratified according to high or low *TP63* expression as in (C-E) for which survival information was available. *p* value was calculated using the log rank (Mantel-Cox) test.

(J) Bar chart shows *TP63* isoform expression in the indicated human PDA cell lines.

(K-L) Gene ontology (GO) analysis with Metascape of (K) significantly down regulated genes following TP63 knockout in BxPC3 cells or (L) significantly upregulated genes following  $\Delta Np63$  expression in SUIT2 cells. For GO analysis, terms are ranked by their significance (*p* value) and the most significant terms ( $-\log_{10} p$  value >8) are highlighted.

(M) GSEA plot evaluating the Squamous-PDA and Progenitor-PDA Identity signatures upon  $\Delta Np63$  expression in PATU8988S cells.

(N) Representative Western blot analysis in the indicated murine KPC cells for the indicated proteins. Whole cell lysates were prepared 48 hours following doxycycline administration.

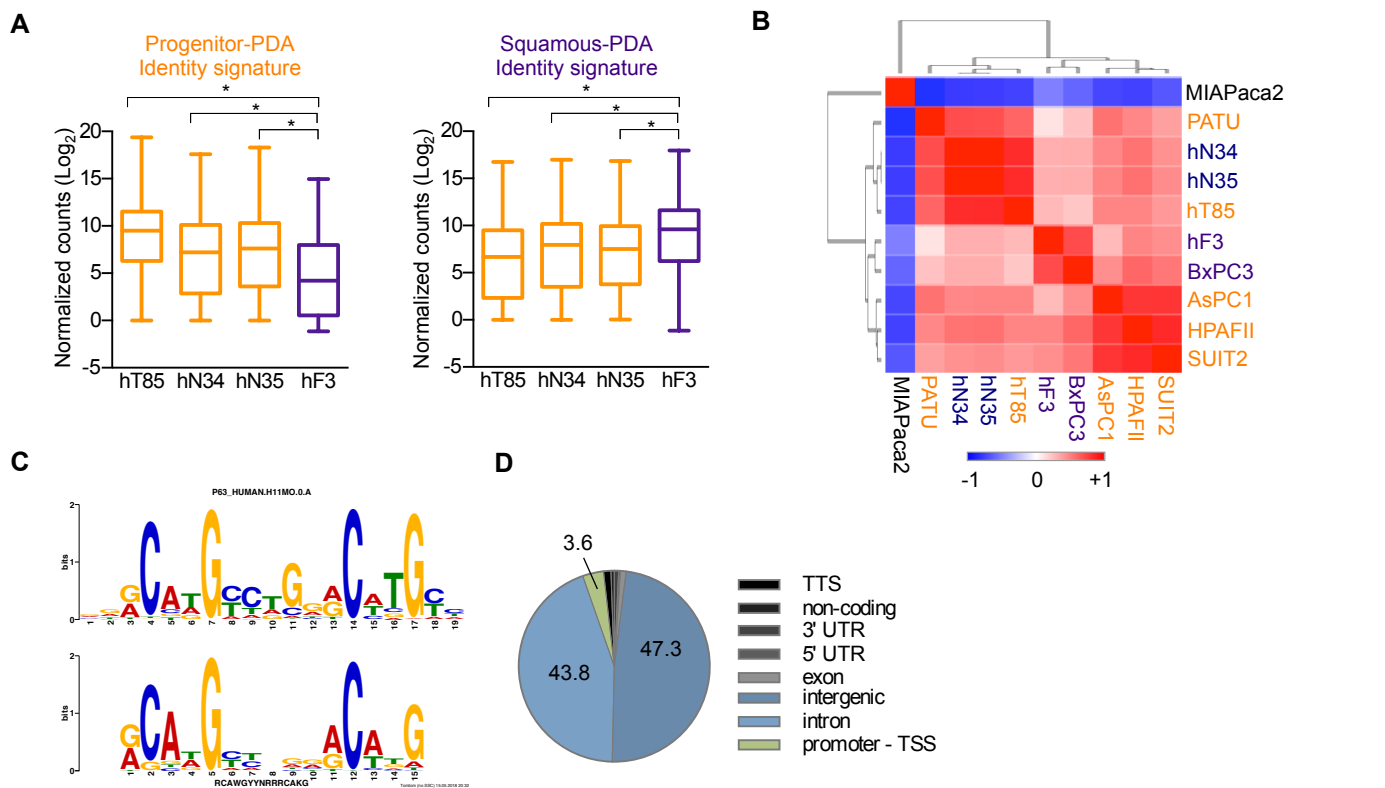

**Figure S2. Progenitor-PDA and Squamous-PDA Identity Signature Expression in Human Organoids and a Unique Enhancer Landscape Linked to  $\Delta$ Np63 Occupancy in PDA. Related to Figure 2.**

(A) Box plots show expression levels of Progenitor-PDA Identity genes (left panel) or Squamous-PDA Identity genes (right panel) in the indicated human organoid samples. Data are from Tiriác et al (2018). \* $p < 0.0001$  by one-way ANOVA.

(B) Heat map representation of unsupervised hierarchical clustering of ten human cell lines or organoids representing PDA or normal pancreatic ducts based on H3K27ac occupancy at total H3K27ac ChIP-seq peaks. Global H3K27ac profiles were correlated by Pearson correlation and clustered by Euclidean distance with average linkage using Morpheus. Scale bar indicates Pearson correlation coefficient. Normal organoids, hN34, hN35; PDA organoids, hF3, hT85; PATU, PATU8988S.

(C) Position weight matrices for TP63 (top panel) and motif recovered from TP63 ChIP-seq in BxPC3 cells (bottom panel). Motif discovery was performed using MEME.

(D) Pie chart showing the genomic distribution of TP63 according to annotation of H3K27ac peaks by HOMER. TTS, transcription termination site; TSS, transcription start site; UTR, untranslated region.

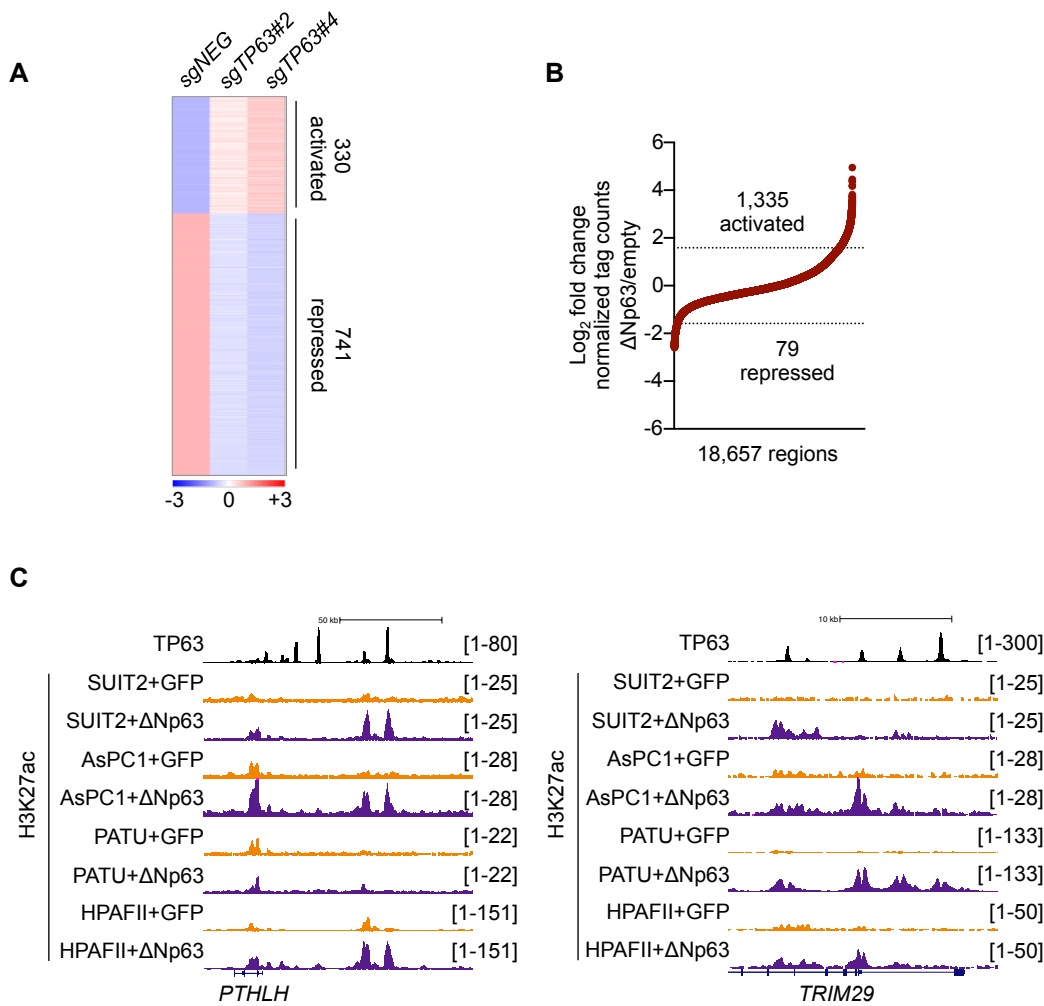

**Figure S3. ΔNp63 Expression is Sufficient to Install and Maintain a Squamous Enhancer Landscape in PDA. Related to Figure 3.**

(A) Heatmap representation of H3K27ac regions with a mean 3 fold change in signal intensity following TP63 knockout in BxPC3-Cas9 cells with two independent sgRNAs compared to those infected with control sgRNAs (sgNEG).

(B) Scatter plot shows H3K27ac regions with a mean 3 fold change in signal intensity following ΔNp63 expression in SUIT2 cells compared to those infected with an empty vector control (empty). Dashed lines indicate 3-fold change value.

(C) ChIP-seq profiles of TP63 (top track) and H3K27ac at representative squamous elements close to *PTHLH* (left panel) and *TRIM29* (right panel) in the indicated cell lines following doxycycline-inducible expression of ΔNp63 or GFP as a control. Cells were cross-linked and prepared for ChIP-seq analysis 48 hours following doxycycline administration.

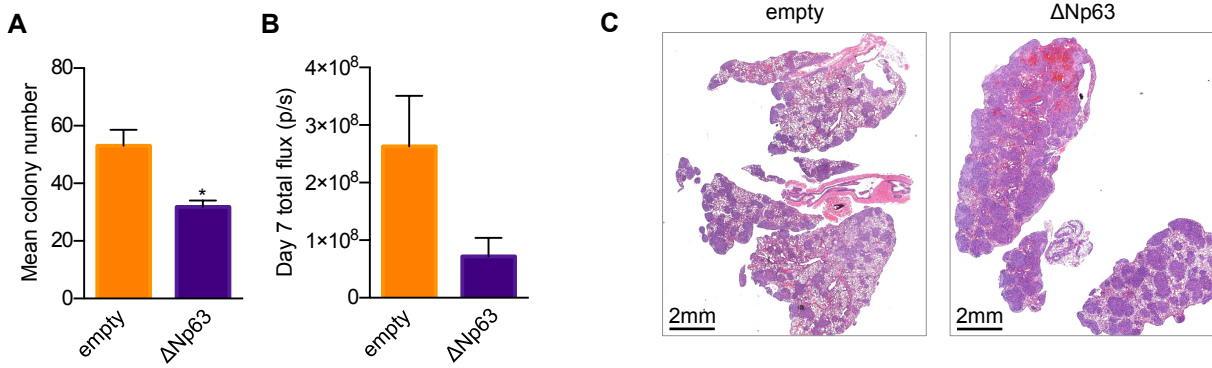

**Figure S4. Phenotypic Consequences of  $\Delta Np63$ -mediated Squamous Lineage Reprogramming. Related to Figure 4.**  
 (A) Bar chart showing quantification of colony number per well in 3D Matrigel colony formation assays on day seven post plating, day 14 post viral transduction. Colony number was counted using ImageJ software (NIH). Mean+SEM is shown.  $n=3$ . \* $p < 0.0001$  by unpaired Student's t test.  $n=3$ .  
 (B) Bar chart showing quantification of bioluminescence signal on day seven post transplantation of cells to the pancreas of immune-deficient mice. Mean+SEM is shown.  $n=4$ .  
 (C) Representative H&E staining of lung tissue for the indicated samples from Figure 4F.

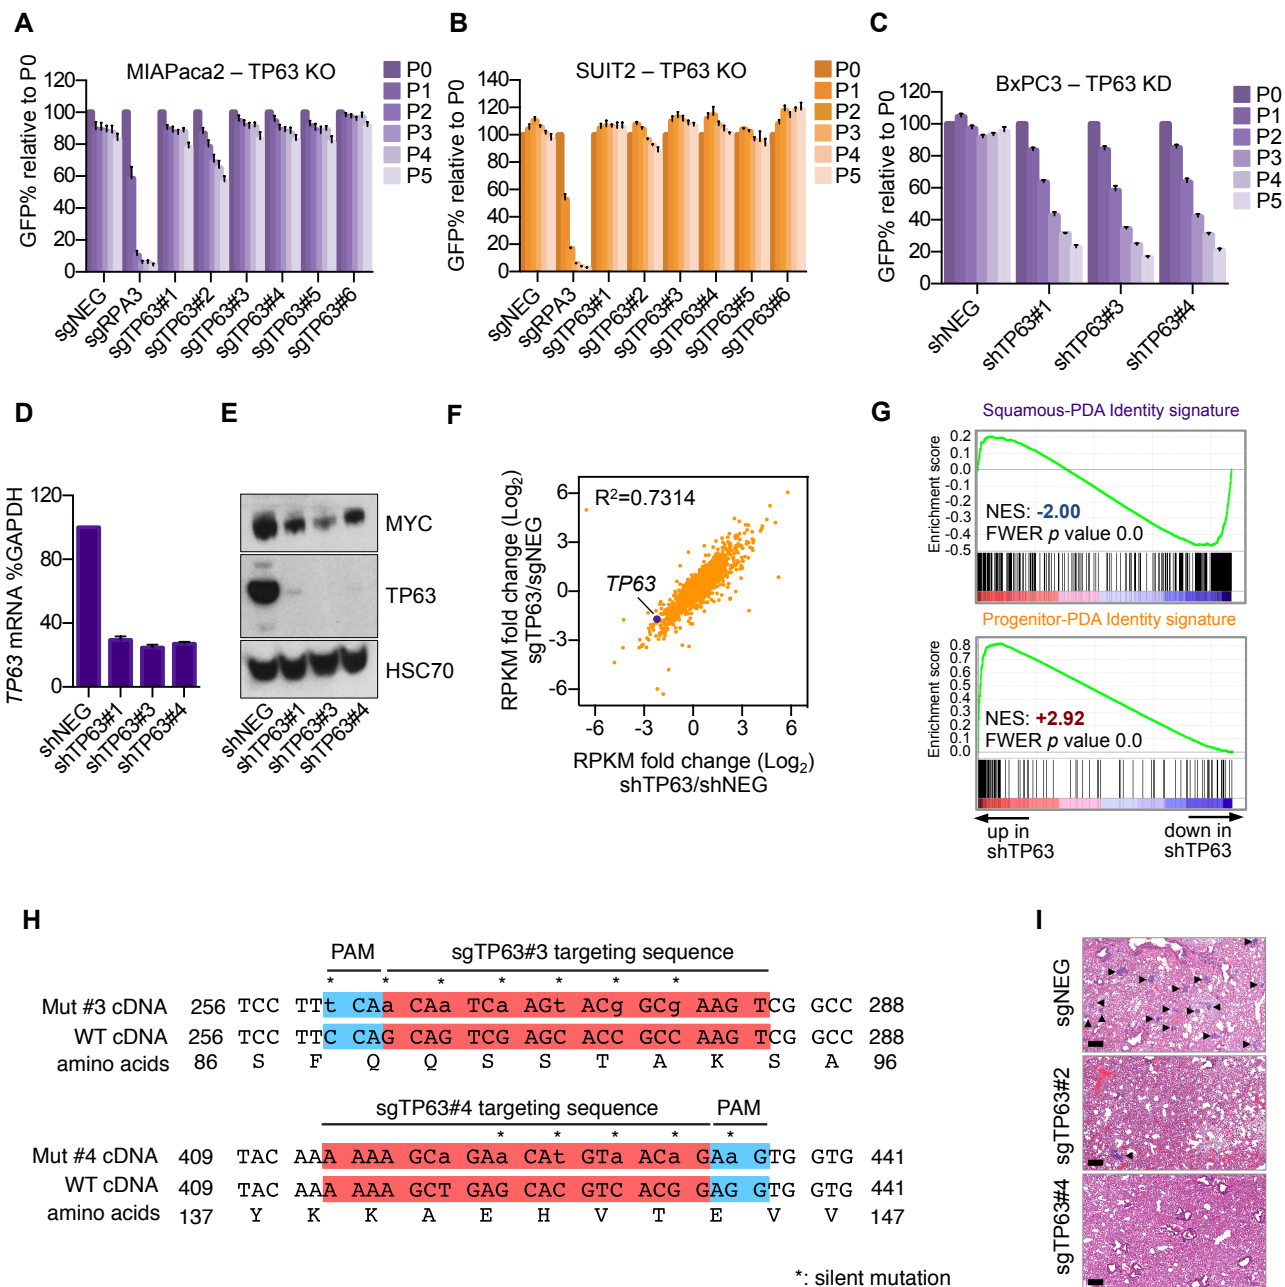

**Figure S5. ΔNp63 is a Dependency in Squamous PDA Cells. Related to Figure 5.**

(A-C) Competition based proliferation assays in the indicated cells following infection with the indicated sgRNAs (A-B) or shRNAs (C) linked to GFP. CRISPR targeting of *TP63* in SUIT2 cells was performed as a negative control to rule out growth arrest as a non-specific effect of forming double-strand DNA breaks associated with CRISPR-Cas9 genome editing. Mean+SEM is shown. n=3.

(D-F) *TP63* knockdown in BxPC3 cells. (D) Bar chart shows RT-qPCR analysis of *TP63* mRNA following infection with the indicated shRNAs. RNA was extracted on day seven post infection with shRNAs, five days post selection with puromycin. Mean+SEM is shown. n=3 technical repeats.

(E) Representative Western blot analysis for the indicated proteins in the indicated conditions. Whole cell lysates were prepared on day five post infection with shRNAs, three days post selection with puromycin. (F) Scatter plot shows the mean fold change in RPKM values of 10,300 expressed genes (RPKM ≥2) comparing two independent shRNAs or sgRNAs targeting *TP63* compared to shNEG or sgNEG, respectively.

(G) GSEA plots evaluating the Squamous-PDA and Progenitor-PDA Identity signatures upon *TP63* knockdown in hF3 organoids. RNA was extracted on day eight-post infection with shRNAs, five days post selection with puromycin.

(H) Illustration of ΔNp63 cDNA rescue assay. Multiple silent mutations were cloned into the ΔNp63 cDNA to disrupt base-pairing with *TP63* sgRNA#3 (Mut#3, top panel) or *TP63* sgRNA#4 (Mut #4, bottom panel).

(I) Representation H&E staining of lung tissue for the indicated samples from Figure 5E. Arrowheads indicate tumor lesions. Scale bar indicates 250μm.

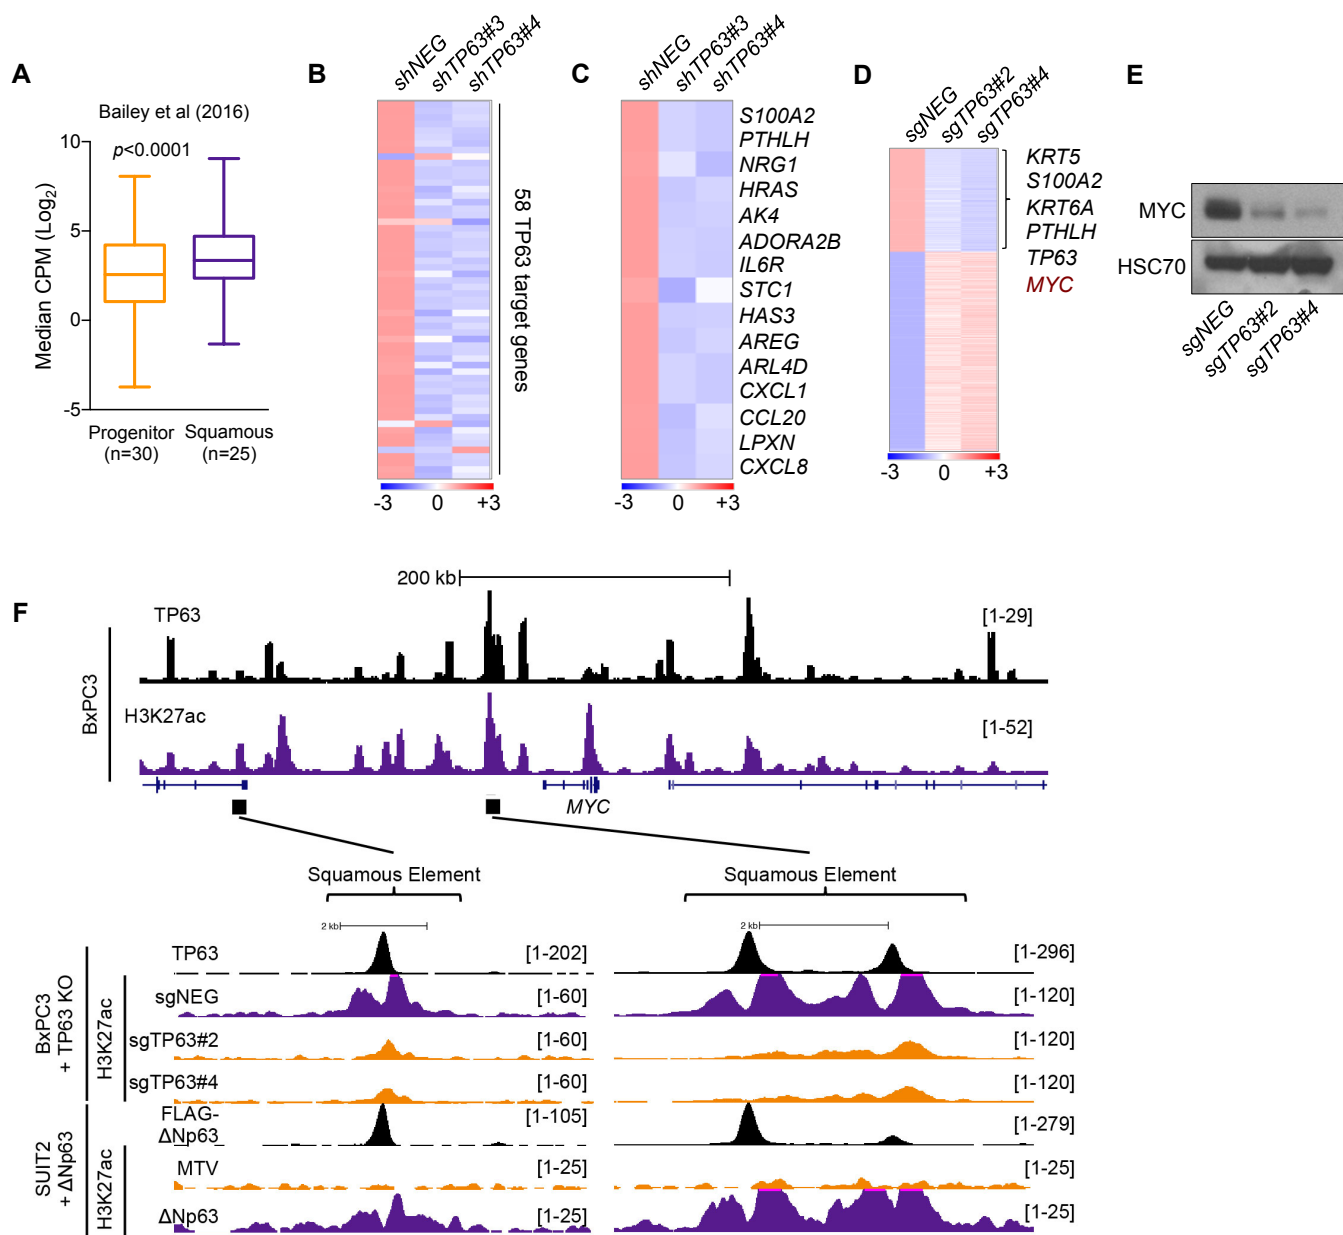

**Figure S6. The Core Circuitry of  $\Delta\text{Np63}$ -mediated enhancer Reprogramming in Squamous PDA Cells. Related to Figure 6.**

(A) Box plots show median expression values of the 58  $\Delta\text{Np63}$  target genes in Progenitor or Squamous PDA tumors.

(B-C) Heatmap representation of the 58 TP63 target genes from Figure 6A (B) or those with oncogenic potential from Figure 6B (C) following TP63 knockdown in hF3 organoids.

(D) Heatmap representation of significantly changed genes following TP63 knockout in BxPC3 cells. Selected genes significantly down regulated following TP63 knockout are highlighted.

(E) MYC expression following TP63 knockout in BxPC3 cells. Representative Western blot analysis for the indicated proteins in the indicated conditions. Whole cell lysates were prepared on day five post infection with sgRNAs, three days post selection with G418.

(F) ChIP-seq profiles of TP63 and H3K27ac surrounding the MYC locus in BxPC3 cells (top panel) and at the indicated Squamous Elements following TP63 knock out or expression in BxPC3-Cas9 cells and SUI2 cells, respectively (bottom panel).
